# Supplementary material for: A kinetic study on the reduction of CO2 by frustrated Lewis pairs: from understanding to rational design
Source: Royal Society of Chemistry journal article supplement (doi:10.1039/c5cp06925d), 2015-12-22
Supplement: c5cp06925d1.pdf [file c5cp06925d1.pdf]

## Supporting Information

**A kinetic study on the reduction of CO<sub>2</sub> by frustrated Lewis pairs: from understanding to rational design**

Lei Liu, Nina Vankova, Thomas Heine

Department of Physics and Earth Science, Jacobs University Bremen

Campus Ring 1, 28759, Bremen, Germany

**Table S1.** The only one imaginary frequencies of the TSs for H<sub>2</sub> activation and H transfer computed at B97D/6-31G(d) level of theory. All values are given in cm<sup>-1</sup>.

|                                                                                             | FLPs | TS <sup>a</sup> | TS <sup>b</sup> |
|---------------------------------------------------------------------------------------------|------|-----------------|-----------------|
| TMP + B(C <sub>6</sub> F <sub>5</sub> ) <sub>3</sub> ( <b>1</b> )                           |      | -29.1           | -111.9          |
| btam + B(C <sub>6</sub> F <sub>5</sub> ) <sub>3</sub> ( <b>2</b> )                          |      | -38.3           | -74.0           |
| Lut + B(C <sub>6</sub> F <sub>5</sub> ) <sub>3</sub> ( <b>3</b> )                           |      | -69.1           | -60.7           |
| TMP + B( <i>p</i> -C <sub>6</sub> F <sub>2</sub> H <sub>3</sub> ) <sub>3</sub> ( <b>4</b> ) |      | -63.4           | -156.1          |
| TMP + B(C <sub>6</sub> H <sub>5</sub> ) <sub>3</sub> ( <b>5</b> )                           |      | -148.3          | -162.5          |

### Cartesian coordinates

#### H<sub>2</sub>

|   |           |           |           |
|---|-----------|-----------|-----------|
| H | -0.497242 | -0.384892 | -0.000051 |
| H | -0.993299 | -0.939246 | 0.018316  |

#### CO<sub>2</sub>

|   |           |           |          |
|---|-----------|-----------|----------|
| C | -2.317661 | 0.049843  | 0.035655 |
| O | -3.467351 | 0.302441  | 0.007250 |
| O | -1.167971 | -0.202754 | 0.064060 |

#### HCOOH

|   |           |           |           |
|---|-----------|-----------|-----------|
| C | -0.002146 | -0.202687 | 0.382703  |
| H | -0.009860 | 0.803483  | 0.864184  |
| O | 0.008671  | -0.147356 | -0.980661 |
| H | 0.006556  | 0.790163  | -1.255880 |
| O | -0.003222 | -1.243603 | 0.989655  |

#### TMP

|   |           |           |           |
|---|-----------|-----------|-----------|
| C | -0.032996 | 0.826565  | 0.525177  |
| C | -1.471627 | 0.302790  | 0.311989  |
| C | -1.511978 | -1.258490 | 0.090451  |
| N | -0.269245 | -1.934141 | 0.547382  |
| C | 1.030363  | -1.420809 | 0.013539  |
| C | 0.952035  | 0.085685  | -0.391791 |
| H | 0.752512  | -2.234385 | -2.008329 |
| H | 3.080144  | -1.357545 | 0.771682  |
| C | 2.069710  | -1.589025 | 1.141962  |

|   |           |           |           |
|---|-----------|-----------|-----------|
| H | 1.847290  | -0.913453 | 1.985607  |
| H | 2.059191  | -2.626665 | 1.512725  |
| C | 1.478311  | -2.281834 | -1.185641 |
| H | 2.451407  | -1.924723 | -1.563899 |
| H | 1.579861  | -3.333511 | -0.875958 |
| H | -1.694612 | -2.660231 | -1.571858 |
| H | -2.503420 | -1.695355 | 1.990217  |
| C | -2.662008 | -1.872766 | 0.912065  |
| H | -3.620739 | -1.409041 | 0.630066  |
| H | -2.721112 | -2.958517 | 0.740446  |
| C | -1.763676 | -1.575533 | -1.399250 |
| H | -2.770359 | -1.228486 | -1.683757 |
| H | -1.041040 | -1.067061 | -2.052668 |
| H | 0.616877  | 0.182604  | -1.438441 |
| H | 1.958783  | 0.532579  | -0.339183 |
| H | -1.916496 | 0.808840  | -0.562176 |
| H | -2.091616 | 0.578239  | 1.182135  |
| H | -0.244731 | -1.820315 | 1.564116  |
| H | 0.268758  | 0.662336  | 1.574526  |
| H | 0.004506  | 1.914121  | 0.352649  |

**TMPH+**

|   |           |           |           |
|---|-----------|-----------|-----------|
| C | -0.270841 | 0.872955  | -0.454570 |
| C | -1.300992 | 0.192270  | 0.462378  |
| C | -1.552406 | -1.274310 | 0.040678  |
| N | -0.203379 | -1.837001 | -0.547024 |
| C | 1.156804  | -1.275527 | -0.040173 |
| C | 1.143626  | 0.266859  | -0.273964 |
| H | 2.081849  | -1.776988 | -1.965333 |
| H | 2.341474  | -1.385218 | 1.743503  |
| C | 1.319755  | -1.652000 | 1.438358  |
| H | 0.624688  | -1.105246 | 2.086615  |
| H | 1.192454  | -2.734618 | 1.596860  |
| C | 2.227617  | -1.975996 | -0.890964 |
| H | 3.213158  | -1.579432 | -0.609090 |
| H | 2.237334  | -3.064515 | -0.719230 |
| H | -2.652656 | -2.400230 | -1.488277 |
| H | -1.256171 | -2.174203 | 2.024708  |
| C | -1.986446 | -2.169719 | 1.206283  |
| H | -2.935681 | -1.779815 | 1.600748  |
| H | -2.164560 | -3.204460 | 0.870425  |

|   |           |           |           |
|---|-----------|-----------|-----------|
| C | -2.561690 | -1.367561 | -1.115396 |
| H | -3.548812 | -1.053282 | -0.749677 |
| H | -2.281884 | -0.704320 | -1.949572 |
| H | 1.759182  | 0.511078  | -1.152635 |
| H | 1.631920  | 0.732281  | 0.594665  |
| H | -2.266448 | 0.717167  | 0.421956  |
| H | -0.957266 | 0.233944  | 1.506969  |
| H | -0.198077 | -2.859074 | -0.425804 |
| H | -0.230198 | 1.950489  | -0.246398 |
| H | -0.594245 | 0.774678  | -1.505178 |
| H | -0.220072 | -1.675236 | -1.562967 |

**btam**

|   |           |           |           |
|---|-----------|-----------|-----------|
| N | -0.519316 | -2.848639 | -0.264323 |
| H | -0.116008 | -5.250336 | 1.146769  |
| H | -0.898879 | -2.307785 | -1.046759 |
| C | 0.835129  | -3.281017 | -0.637527 |
| C | -1.494735 | -3.916225 | 0.069397  |
| C | -2.826317 | -3.199038 | 0.368232  |
| H | -3.603387 | -3.928231 | 0.646380  |
| H | -2.693569 | -2.480407 | 1.191227  |
| H | -3.176563 | -2.648630 | -0.522098 |
| C | -1.707254 | -4.927739 | -1.084514 |
| H | -2.041846 | -4.404218 | -1.996208 |
| H | -2.473964 | -5.672242 | -0.814542 |
| H | -0.776996 | -5.469308 | -1.316985 |
| C | -1.025705 | -4.659400 | 1.336364  |
| H | -0.815239 | -3.937151 | 2.140147  |
| H | -1.811747 | -5.352451 | 1.674855  |
| H | 1.011194  | -0.906167 | 0.687739  |
| H | 0.864071  | -3.997009 | -1.486935 |
| H | 1.264055  | -3.811223 | 0.229706  |
| C | 1.708445  | -2.083643 | -0.976942 |
| C | 2.560164  | -2.113294 | -2.095438 |
| C | 3.388930  | -1.020499 | -2.396405 |
| C | 3.367393  | 0.121412  | -1.581191 |
| C | 2.513096  | 0.162969  | -0.465958 |
| C | 1.690368  | -0.931710 | -0.165811 |
| H | 2.570814  | -3.000569 | -2.734467 |
| H | 4.043933  | -1.058967 | -3.269773 |
| H | 4.007649  | 0.974943  | -1.814779 |

|   |          |          |          |
|---|----------|----------|----------|
| H | 2.489052 | 1.050726 | 0.170396 |
|---|----------|----------|----------|

**batmH<sup>+</sup>**

|   |           |           |           |
|---|-----------|-----------|-----------|
| N | -0.482777 | -2.905968 | -0.400757 |
| H | -0.301275 | -4.968344 | 1.504154  |
| H | -0.714558 | -2.548150 | -1.339232 |
| C | 1.006642  | -3.301382 | -0.422055 |
| C | -1.550843 | -3.965349 | 0.002166  |
| C | -2.898391 | -3.232193 | -0.086969 |
| H | -3.701142 | -3.930418 | 0.187390  |
| H | -2.939521 | -2.378934 | 0.609084  |
| H | -3.095733 | -2.874969 | -1.110532 |
| C | -1.470763 | -5.119823 | -1.003498 |
| H | -1.603752 | -4.762721 | -2.037435 |
| H | -2.284575 | -5.825335 | -0.785582 |
| H | -0.521868 | -5.669188 | -0.926121 |
| C | -1.249073 | -4.415835 | 1.436241  |
| H | -1.224571 | -3.560166 | 2.130127  |
| H | -2.053238 | -5.089422 | 1.763525  |
| H | 2.099506  | -1.384011 | 1.186504  |
| H | 1.084372  | -4.139135 | -1.123914 |
| H | 1.241215  | -3.640994 | 0.592880  |
| C | 1.813190  | -2.104214 | -0.843077 |
| C | 2.052236  | -1.862184 | -2.210447 |
| C | 2.744923  | -0.709559 | -2.606686 |
| C | 3.196049  | 0.204029  | -1.639199 |
| C | 2.959999  | -0.034131 | -0.274745 |
| C | 2.267520  | -1.185941 | 0.124252  |
| H | 1.717325  | -2.584991 | -2.959609 |
| H | 2.941146  | -0.529597 | -3.664275 |
| H | 3.740546  | 1.097221  | -1.948119 |
| H | 3.322934  | 0.669439  | 0.475355  |
| H | -0.571970 | -2.095054 | 0.229291  |

**Lut**

|   |           |           |           |
|---|-----------|-----------|-----------|
| C | 0.335938  | -2.794230 | -0.322217 |
| C | -0.882756 | -3.476912 | -0.420673 |
| C | -0.864226 | -4.877078 | -0.571575 |
| N | 0.282643  | -5.586976 | -0.624989 |
| C | 1.455652  | -4.925913 | -0.529801 |
| C | 1.527580  | -3.527618 | -0.377284 |

|   |           |           |           |
|---|-----------|-----------|-----------|
| H | -1.833858 | -2.942598 | -0.382266 |
| H | -2.205173 | -6.419808 | 0.126015  |
| H | 2.739806  | -6.333899 | -1.546356 |
| H | 2.498321  | -3.033762 | -0.304298 |
| H | 0.356646  | -1.708295 | -0.204502 |
| C | -2.147210 | -5.674473 | -0.683713 |
| H | -3.033527 | -5.024177 | -0.632295 |
| H | -2.168674 | -6.230925 | -1.634724 |
| C | 2.707247  | -5.776544 | -0.596191 |
| H | 3.617625  | -5.163999 | -0.512016 |
| H | 2.704475  | -6.523225 | 0.214370  |

**LutH<sup>+</sup>**

|   |           |           |           |
|---|-----------|-----------|-----------|
| C | 0.340799  | -2.794580 | -0.342388 |
| C | -0.887475 | -3.469726 | -0.417174 |
| C | -0.909091 | -4.861751 | -0.526686 |
| N | 0.298529  | -5.506576 | -0.556075 |
| C | 1.525606  | -4.902839 | -0.487042 |
| C | 1.547386  | -3.510844 | -0.377243 |
| H | -1.832184 | -2.929645 | -0.391600 |
| H | -2.209951 | -6.402698 | 0.235897  |
| H | 2.773421  | -6.356681 | -1.476490 |
| H | 2.508418  | -3.002903 | -0.320453 |
| H | 0.357750  | -1.707568 | -0.256858 |
| C | -2.151571 | -5.700932 | -0.612603 |
| H | -3.042412 | -5.061449 | -0.594754 |
| H | -2.164174 | -6.290291 | -1.544297 |
| C | 2.741297  | -5.783251 | -0.535285 |
| H | 3.651820  | -5.175487 | -0.468756 |
| H | 2.739664  | -6.500996 | 0.301677  |
| H | 0.282653  | -6.524844 | -0.636457 |

**B(C<sub>6</sub>F<sub>5</sub>)<sub>3</sub>**

|   |           |           |           |
|---|-----------|-----------|-----------|
| F | 1.495131  | 1.339995  | 0.432779  |
| B | -0.600727 | -0.659408 | -0.028500 |
| F | -2.235227 | -0.069101 | 2.334716  |
| F | 0.827637  | -2.983769 | 1.049181  |
| C | -1.263354 | -2.025418 | 0.385335  |
| C | -2.653101 | -2.249032 | 0.279349  |
| C | -3.259889 | -3.459378 | 0.633440  |
| C | -2.464514 | -4.501260 | 1.135724  |

|   |           |           |           |
|---|-----------|-----------|-----------|
| C | -1.078238 | -4.325303 | 1.268766  |
| C | -0.506567 | -3.106372 | 0.886734  |
| F | -3.460490 | -1.285711 | -0.212142 |
| F | -4.584652 | -3.635635 | 0.499507  |
| F | -3.028280 | -5.663060 | 1.487959  |
| F | -0.322533 | -5.321960 | 1.758158  |
| C | 0.815112  | -0.647762 | -0.715169 |
| C | 1.212517  | -1.642013 | -1.634934 |
| C | 2.463277  | -1.644193 | -2.262665 |
| C | 3.381557  | -0.626702 | -1.959487 |
| C | 3.037492  | 0.380273  | -1.044032 |
| C | 1.770034  | 0.357696  | -0.451087 |
| F | 0.361389  | -2.634003 | -1.972609 |
| F | 2.793810  | -2.600564 | -3.145809 |
| F | 4.586043  | -0.616812 | -2.543471 |
| F | 3.922851  | 1.346624  | -0.750261 |
| C | -1.354237 | 0.694892  | 0.243799  |
| C | -1.294184 | 1.781998  | -0.654627 |
| C | -1.965030 | 2.990469  | -0.435411 |
| C | -2.721342 | 3.149303  | 0.736429  |
| C | -2.804980 | 2.100857  | 1.666026  |
| C | -2.134495 | 0.901165  | 1.401918  |
| F | -0.593819 | 1.675613  | -1.803473 |
| F | -1.895106 | 3.993382  | -1.326119 |
| F | -3.363044 | 4.301108  | 0.967503  |
| F | -3.522566 | 2.260737  | 2.790115  |

**B(C<sub>6</sub>F<sub>5</sub>)<sub>3</sub>H<sup>-</sup>**

|   |           |           |           |
|---|-----------|-----------|-----------|
| F | 0.978253  | 1.676160  | -1.579313 |
| B | -0.774374 | -0.533972 | -0.936488 |
| F | 0.707870  | 0.849709  | 1.397273  |
| F | -0.459154 | -1.788094 | 1.720023  |
| C | -1.546661 | -1.889312 | -0.399809 |
| C | -2.497199 | -2.575898 | -1.167058 |
| C | -3.224265 | -3.678954 | -0.686836 |
| C | -3.004347 | -4.131673 | 0.618911  |
| C | -2.061822 | -3.478233 | 1.424860  |
| C | -1.366031 | -2.381340 | 0.901118  |
| F | -2.761527 | -2.201114 | -2.443419 |
| F | -4.135047 | -4.313382 | -1.467370 |
| F | -3.693879 | -5.193949 | 1.099951  |

|   |           |           |           |
|---|-----------|-----------|-----------|
| F | -1.842887 | -3.918383 | 2.688897  |
| C | 0.867140  | -0.655586 | -1.057206 |
| C | 1.634862  | -1.822141 | -0.922906 |
| C | 3.029132  | -1.864577 | -1.099246 |
| C | 3.718934  | -0.695345 | -1.433277 |
| C | 2.999904  | 0.496682  | -1.589454 |
| C | 1.611483  | 0.485549  | -1.405861 |
| F | 1.055707  | -3.015042 | -0.618887 |
| F | 3.715679  | -3.025772 | -0.954643 |
| F | 5.062087  | -0.714859 | -1.609863 |
| F | 3.658028  | 1.636123  | -1.918731 |
| C | -1.279636 | 0.689624  | 0.061986  |
| C | -2.582806 | 1.190418  | -0.093521 |
| C | -3.132579 | 2.202319  | 0.707479  |
| C | -2.359331 | 2.753791  | 1.736580  |
| C | -1.058504 | 2.280413  | 1.942965  |
| C | -0.554608 | 1.262585  | 1.117004  |
| F | -3.393433 | 0.685364  | -1.059385 |
| F | -4.397161 | 2.651273  | 0.507163  |
| F | -2.866095 | 3.732280  | 2.524878  |
| F | -0.309510 | 2.806277  | 2.944137  |
| H | -1.177954 | -0.272252 | -2.057619 |

**B(C<sub>6</sub>F<sub>2</sub>H<sub>3</sub>)<sub>3</sub>**

|   |           |           |           |
|---|-----------|-----------|-----------|
| C | -1.176635 | -5.818315 | 0.824501  |
| C | -2.319113 | -6.621523 | 1.068350  |
| C | -2.827042 | -6.730860 | 2.364646  |
| C | -2.263876 | -6.050384 | 3.450378  |
| C | -1.144316 | -5.251059 | 3.192146  |
| C | -0.587553 | -5.133124 | 1.916864  |
| H | -2.802788 | -7.166377 | 0.259043  |
| F | -3.908115 | -7.514590 | 2.588615  |
| H | -2.678821 | -6.139054 | 4.452708  |
| F | -0.583321 | -4.578507 | 4.224645  |
| C | 0.969373  | -5.461632 | -0.819064 |
| C | 1.902990  | -5.984778 | 0.110703  |
| C | 3.270042  | -5.780238 | -0.088313 |
| C | 3.768553  | -5.046637 | -1.171063 |
| C | 2.834413  | -4.525417 | -2.073675 |
| C | 1.460248  | -4.727279 | -1.927963 |
| H | 1.570373  | -6.556115 | 0.976119  |



|   |           |           |           |
|---|-----------|-----------|-----------|
| F | 4.153258  | -6.299307 | 0.796899  |
| H | 4.836994  | -4.888250 | -1.305385 |
| F | 3.290474  | -3.807761 | -3.127282 |
| C | -1.520435 | -5.791234 | -1.880312 |
| C | -1.043277 | -6.318055 | -3.106906 |
| C | -1.902134 | -6.409057 | -4.204342 |
| C | -3.230961 | -5.972268 | -4.154563 |
| C | -3.684341 | -5.442862 | -2.940799 |
| C | -2.868063 | -5.356601 | -1.810972 |
| H | -0.015506 | -6.664607 | -3.204502 |
| F | -1.440297 | -6.929888 | -5.365604 |
| H | -3.883872 | -6.041250 | -5.022689 |
| F | -4.964621 | -5.008511 | -2.867776 |
| H | 0.778959  | -4.306406 | -2.665866 |
| B | -0.575948 | -5.690485 | -0.624944 |
| H | -3.275845 | -4.944047 | -0.889337 |
| H | 0.290029  | -4.504218 | 1.774806  |

**B(C<sub>6</sub>F<sub>2</sub>H<sub>3</sub>)<sub>3</sub>H<sup>-</sup>**

|   |           |           |           |
|---|-----------|-----------|-----------|
| C | -1.258726 | -5.373803 | 0.840534  |
| C | -1.794376 | -6.682656 | 0.890102  |
| C | -2.162124 | -7.251566 | 2.111460  |
| C | -2.031143 | -6.580086 | 3.331508  |
| C | -1.500711 | -5.285691 | 3.267573  |
| C | -1.120027 | -4.683526 | 2.068606  |
| H | -1.933776 | -7.255733 | -0.028040 |
| F | -2.678649 | -8.520259 | 2.134299  |
| H | -2.328453 | -7.035016 | 4.274880  |
| F | -1.361525 | -4.595552 | 4.443938  |
| C | 0.869963  | -4.943914 | -0.766222 |
| C | 1.529168  | -6.090653 | -0.263342 |
| C | 2.885100  | -6.299829 | -0.524966 |
| C | 3.658686  | -5.410671 | -1.278269 |
| C | 2.993866  | -4.280079 | -1.768948 |
| C | 1.641460  | -4.036395 | -1.531211 |
| H | 0.985174  | -6.817669 | 0.341964  |
| F | 3.501680  | -7.417437 | -0.027266 |
| H | 4.716473  | -5.584773 | -1.468161 |
| F | 3.721715  | -3.384282 | -2.508737 |
| C | -1.590024 | -5.260785 | -1.837208 |
| C | -1.150202 | -6.358559 | -2.614188 |

|   |           |           |           |
|---|-----------|-----------|-----------|
| C | -1.942773 | -6.854359 | -3.651940 |
| C | -3.187778 | -6.309584 | -3.982961 |
| C | -3.610081 | -5.223383 | -3.206480 |
| C | -2.849059 | -4.700601 | -2.161370 |
| H | -0.182550 | -6.821979 | -2.414819 |
| F | -1.495706 | -7.918095 | -4.390547 |
| H | -3.791080 | -6.703655 | -4.799070 |
| F | -4.824317 | -4.661072 | -3.504738 |
| H | 1.179523  | -3.136439 | -1.940757 |
| B | -0.739580 | -4.675785 | -0.555894 |
| H | -3.232568 | -3.852115 | -1.592150 |
| H | -0.712912 | -3.671071 | 2.083510  |
| H | -0.929710 | -3.453919 | -0.480902 |

**B(C<sub>6</sub>H<sub>5</sub>)<sub>3</sub>**

|   |           |           |           |
|---|-----------|-----------|-----------|
| C | -1.207589 | -5.814475 | 0.814939  |
| C | -2.362830 | -6.608570 | 1.037299  |
| C | -2.916104 | -6.758209 | 2.316156  |
| C | -2.338670 | -6.093011 | 3.410802  |
| C | -1.201509 | -5.289970 | 3.220854  |
| C | -0.640600 | -5.165236 | 1.942633  |
| H | -2.819740 | -7.122571 | 0.189371  |
| H | -3.797079 | -7.387608 | 2.461640  |
| H | -2.773005 | -6.200032 | 4.407580  |
| H | -0.753441 | -4.767234 | 4.069032  |
| C | 0.967586  | -5.437106 | -0.783801 |
| C | 1.895053  | -5.977258 | 0.145011  |
| C | 3.276116  | -5.791330 | -0.003684 |
| C | 3.768543  | -5.033903 | -1.079772 |
| C | 2.874878  | -4.476041 | -2.009413 |
| C | 1.496843  | -4.687294 | -1.866516 |
| H | 1.517984  | -6.561315 | 0.986823  |
| H | 3.968794  | -6.230974 | 0.717667  |
| H | 4.844088  | -4.879133 | -1.193419 |
| H | 3.254337  | -3.882197 | -2.844163 |
| C | -1.504685 | -5.728263 | -1.893306 |
| C | -1.021456 | -6.226715 | -3.131334 |
| C | -1.843037 | -6.300627 | -4.264252 |
| C | -3.172653 | -5.851747 | -4.195030 |
| C | -3.676799 | -5.341671 | -2.986818 |
| C | -2.855333 | -5.293910 | -1.852370 |

|   |           |           |           |
|---|-----------|-----------|-----------|
| H | 0.013102  | -6.570126 | -3.192820 |
| H | -1.449759 | -6.702553 | -5.200851 |
| H | -3.813149 | -5.899137 | -5.078877 |
| H | -4.708492 | -4.986761 | -2.931338 |
| H | 0.807634  | -4.257199 | -2.595842 |
| B | -0.581665 | -5.660026 | -0.620585 |
| H | -3.254521 | -4.902595 | -0.914549 |
| H | 0.247037  | -4.545245 | 1.802097  |

**B(C<sub>6</sub>H<sub>5</sub>)<sub>3</sub>H<sup>-</sup>**

|   |           |           |           |
|---|-----------|-----------|-----------|
| C | -1.252045 | -5.356616 | 0.837504  |
| C | -1.876337 | -6.624396 | 0.918281  |
| C | -2.271031 | -7.193669 | 2.142300  |
| C | -2.053370 | -6.502149 | 3.344997  |
| C | -1.436198 | -5.239067 | 3.301506  |
| C | -1.047831 | -4.688687 | 2.069883  |
| H | -2.062164 | -7.172582 | -0.010270 |
| H | -2.752433 | -8.178078 | 2.158512  |
| H | -2.361846 | -6.937480 | 4.301165  |
| H | -1.261299 | -4.685258 | 4.231028  |
| C | 0.888926  | -4.977847 | -0.774551 |
| C | 1.554643  | -6.106335 | -0.238553 |
| C | 2.917736  | -6.359705 | -0.473980 |
| C | 3.673382  | -5.477424 | -1.263291 |
| C | 3.044165  | -4.344940 | -1.810440 |
| C | 1.681702  | -4.110704 | -1.565505 |
| H | 0.983051  | -6.798327 | 0.387392  |
| H | 3.393445  | -7.245678 | -0.038314 |
| H | 4.736184  | -5.666109 | -1.447158 |
| H | 3.620472  | -3.645121 | -2.426413 |
| C | -1.579553 | -5.273196 | -1.849413 |
| C | -1.148216 | -6.351816 | -2.658042 |
| C | -1.929160 | -6.865490 | -3.708903 |
| C | -3.186281 | -6.307305 | -3.992064 |
| C | -3.645830 | -5.233269 | -3.208874 |
| C | -2.852104 | -4.735891 | -2.163238 |
| H | -0.167058 | -6.792422 | -2.456922 |
| H | -1.555467 | -7.701587 | -4.310872 |
| H | -3.797813 | -6.699534 | -4.811283 |
| H | -4.623729 | -4.784782 | -3.418327 |
| H | 1.203134  | -3.225475 | -1.997289 |

|   |           |           |           |
|---|-----------|-----------|-----------|
| B | -0.719538 | -4.691443 | -0.571459 |
| H | -3.221194 | -3.899574 | -1.560379 |
| H | -0.567863 | -3.704660 | 2.049284  |
| H | -0.892740 | -3.460733 | -0.512090 |

**FLP1**

|   |           |           |           |
|---|-----------|-----------|-----------|
| C | 0.269068  | 0.753556  | -0.858854 |
| C | -1.022472 | 0.200665  | -0.238463 |
| C | -1.032694 | -1.351599 | -0.294782 |
| N | 0.367473  | -1.853767 | -0.215282 |
| C | 1.354158  | -1.102289 | 0.593729  |
| C | 1.498990  | 0.332150  | -0.020908 |
| H | 2.972659  | -1.940638 | -0.598031 |
| H | 1.844142  | -0.549753 | 2.659274  |
| C | 1.006737  | -1.008341 | 2.106322  |
| H | 0.116144  | -0.388647 | 2.280046  |
| H | 0.821125  | -2.009618 | 2.523500  |
| C | 2.689809  | -1.860861 | 0.461340  |
| H | 3.486955  | -1.328695 | 1.004273  |
| H | 2.604221  | -2.875123 | 0.886292  |
| H | -1.489096 | -2.900844 | -1.764704 |
| H | -1.566184 | -1.678894 | 1.816033  |
| C | -1.946070 | -1.925447 | 0.815201  |
| H | -2.967502 | -1.519799 | 0.719989  |
| H | -2.015924 | -3.020490 | 0.724942  |
| C | -1.581529 | -1.811461 | -1.663816 |
| H | -2.645234 | -1.539465 | -1.768154 |
| H | -1.006371 | -1.350683 | -2.480370 |
| H | 2.397776  | 0.375778  | -0.657225 |
| H | 1.654497  | 1.053787  | 0.798287  |
| H | -1.912219 | 0.580081  | -0.766641 |
| H | -1.102773 | 0.545826  | 0.805885  |
| H | 0.349222  | -2.820805 | 0.106843  |
| H | 0.225233  | 1.851778  | -0.939316 |
| H | 0.369167  | 0.355002  | -1.880697 |
| F | -4.873275 | -4.677259 | -2.969166 |
| F | 0.603955  | -3.977056 | -2.660892 |
| B | -0.584073 | -5.735066 | -0.616906 |
| F | -3.317074 | -4.643971 | -0.769511 |
| F | 0.347788  | -4.357717 | 1.826473  |
| C | -1.196089 | -5.901754 | 0.826828  |

|   |           |           |           |
|---|-----------|-----------|-----------|
| C | -2.306093 | -6.737860 | 1.081723  |
| C | -2.911023 | -6.846955 | 2.339156  |
| C | -2.410500 | -6.088163 | 3.408806  |
| C | -1.307204 | -5.244101 | 3.210404  |
| C | -0.714410 | -5.188810 | 1.945759  |
| F | -2.825561 | -7.495725 | 0.094385  |
| F | -3.958333 | -7.664042 | 2.534143  |
| F | -2.983680 | -6.169890 | 4.614820  |
| F | -0.830908 | -4.508673 | 4.227773  |
| C | 0.950853  | -5.453655 | -0.803710 |
| C | 1.926609  | -6.030332 | 0.039860  |
| C | 3.292978  | -5.757790 | -0.072869 |
| C | 3.727147  | -4.854216 | -1.055686 |
| C | 2.799804  | -4.262665 | -1.923605 |
| C | 1.443480  | -4.577401 | -1.797774 |
| F | 1.557786  | -6.906708 | 0.998290  |
| F | 4.187006  | -6.337341 | 0.745241  |
| F | 5.025301  | -4.546318 | -1.154671 |
| F | 3.218644  | -3.361995 | -2.827590 |
| C | -1.527322 | -5.790279 | -1.876744 |
| C | -1.108738 | -6.368715 | -3.094014 |
| C | -1.913296 | -6.405800 | -4.238259 |
| C | -3.192996 | -5.831014 | -4.192086 |
| C | -3.653380 | -5.237402 | -3.006426 |
| C | -2.827979 | -5.243120 | -1.877284 |
| F | 0.109703  | -6.941281 | -3.187679 |
| F | -1.479589 | -6.980456 | -5.371961 |
| F | -3.973654 | -5.847060 | -5.279198 |

## FLP2

|   |           |           |           |
|---|-----------|-----------|-----------|
| N | -0.599820 | 0.290567  | -1.328802 |
| H | -0.265226 | -2.339436 | -2.004696 |
| H | -1.026054 | 1.205875  | -1.178856 |
| C | 0.618155  | 0.483502  | -2.139538 |
| C | -1.639020 | -0.637285 | -1.878093 |
| C | -2.966336 | -0.292963 | -1.178298 |
| H | -3.752293 | -0.993792 | -1.498179 |
| H | -2.864656 | -0.350117 | -0.089579 |
| H | -3.288787 | 0.726976  | -1.450984 |
| C | -1.858069 | -0.518635 | -3.406522 |
| H | -2.115843 | 0.512254  | -3.691290 |

|   |           |           |           |
|---|-----------|-----------|-----------|
| H | -2.682954 | -1.185234 | -3.706609 |
| H | -0.960576 | -0.812145 | -3.968840 |
| C | -1.226682 | -2.082452 | -1.535759 |
| H | -1.120980 | -2.203898 | -0.448870 |
| H | -1.987669 | -2.787476 | -1.906794 |
| H | 0.964874  | -0.503828 | -2.475569 |
| H | 1.360023  | 0.031794  | -4.740298 |
| C | 0.513265  | 1.432541  | -3.330585 |
| H | 1.389403  | 0.878856  | -1.464958 |
| C | 0.002866  | 2.734729  | -3.165887 |
| C | -0.081674 | 3.613027  | -4.255890 |
| C | 0.354090  | 3.205145  | -5.527396 |
| C | 0.880997  | 1.915667  | -5.698193 |
| C | 0.958194  | 1.039621  | -4.604833 |
| H | -0.315761 | 3.073413  | -2.177883 |
| H | -0.481189 | 4.619226  | -4.111207 |
| H | 0.287159  | 3.888701  | -6.376235 |
| H | 1.226044  | 1.589724  | -6.681897 |
| F | 2.732970  | 2.133486  | 2.174174  |
| B | 0.620588  | 0.131379  | 1.722232  |
| F | -0.730778 | 0.684494  | 4.273345  |
| F | 2.061620  | -2.345154 | 2.482551  |
| C | -0.041426 | -1.233731 | 2.162022  |
| C | -1.440648 | -1.395446 | 2.268556  |
| C | -2.058747 | -2.615337 | 2.560945  |
| C | -1.261664 | -3.739663 | 2.822343  |
| C | 0.135386  | -3.624627 | 2.784209  |
| C | 0.713209  | -2.389615 | 2.465642  |
| F | -2.271071 | -0.349239 | 2.062385  |
| F | -3.397499 | -2.716283 | 2.614078  |
| F | -1.832346 | -4.913683 | 3.119886  |
| F | 0.900540  | -4.693323 | 3.062817  |
| C | 2.032479  | 0.152339  | 1.017810  |
| C | 2.428648  | -0.819464 | 0.074232  |
| C | 3.644196  | -0.773881 | -0.614970 |
| C | 4.547527  | 0.263742  | -0.343450 |
| C | 4.216355  | 1.242535  | 0.605057  |
| C | 2.979396  | 1.172200  | 1.258332  |
| F | 1.595630  | -1.826062 | -0.259142 |
| F | 3.943786  | -1.699325 | -1.543405 |
| F | 5.720218  | 0.320507  | -0.987604 |

|   |           |          |          |
|---|-----------|----------|----------|
| F | 5.087236  | 2.228348 | 0.879390 |
| C | -0.063134 | 1.502881 | 2.125910 |
| C | -0.055245 | 2.633612 | 1.287445 |
| C | -0.689116 | 3.838553 | 1.605878 |
| C | -1.328946 | 3.964734 | 2.847904 |
| C | -1.331956 | 2.882202 | 3.740160 |
| C | -0.706922 | 1.685426 | 3.367259 |
| F | 0.571335  | 2.591458 | 0.086594 |
| F | -0.681598 | 4.869985 | 0.742289 |
| F | -1.931522 | 5.113986 | 3.180658 |
| F | -1.929725 | 3.005525 | 4.937163 |

### FLP3

|   |           |           |           |
|---|-----------|-----------|-----------|
| F | -2.941307 | -6.558018 | 0.496164  |
| F | -4.109481 | -6.127366 | 2.882279  |
| F | -2.872751 | -4.561760 | 4.762831  |
| F | -0.410606 | -3.467091 | 4.238779  |
| C | 1.139631  | -5.296775 | -0.630491 |
| C | 2.050469  | -5.896465 | 0.265059  |
| C | -1.835192 | -6.220271 | -3.942527 |
| C | 3.438041  | -5.787362 | 0.133133  |
| C | 3.963252  | -5.042403 | -0.935163 |
| C | 3.099957  | -4.439353 | -1.860966 |
| C | -2.912842 | -5.578160 | 2.615339  |
| C | -2.992839 | -5.428215 | -4.000673 |
| C | -3.357595 | -4.645104 | -2.895991 |
| C | -2.563209 | -4.673038 | -1.745769 |
| F | -1.493792 | -6.981912 | -4.995120 |
| C | -2.279173 | -4.783780 | 3.583614  |
| C | -1.020367 | -4.228834 | 3.313979  |
| C | 1.716990  | -4.599917 | -1.715485 |
| C | -0.406864 | -4.489813 | 2.084005  |
| F | -3.747097 | -5.421845 | -5.107048 |
| F | -4.447337 | -3.858893 | -2.958343 |
| H | 2.965553  | -0.974855 | 1.008974  |
| C | -1.372458 | -5.420668 | -1.650066 |
| F | 1.590757  | -6.622202 | 1.306617  |
| F | 4.268823  | -6.382018 | 1.006339  |
| F | 5.289120  | -4.911725 | -1.071020 |
| C | -2.283561 | -5.782938 | 1.382922  |
| F | 3.607895  | -3.714897 | -2.871512 |

|   |           |           |           |
|---|-----------|-----------|-----------|
| C | -1.049200 | -6.194145 | -2.784938 |
| F | 0.056651  | -6.967937 | -2.782402 |
| F | 0.947174  | -4.023278 | -2.656044 |
| B | -0.415596 | -5.342366 | -0.398375 |
| F | -2.963799 | -3.887499 | -0.722699 |
| F | 0.818186  | -3.955071 | 1.917392  |
| C | -1.024618 | -5.230821 | 1.050824  |
| C | -1.135889 | -0.985407 | 1.356294  |
| C | -1.760273 | -1.168701 | 0.114951  |
| C | -0.965027 | -1.476755 | -1.003232 |
| N | 0.376351  | -1.627229 | -0.917504 |
| C | 0.974782  | -1.451524 | 0.277613  |
| C | 0.254028  | -1.115070 | 1.441178  |
| H | -2.842208 | -1.080093 | 0.008053  |
| H | -2.650584 | -1.810531 | -2.334952 |
| H | 2.900679  | -1.584504 | -0.681399 |
| H | 0.773820  | -0.994602 | 2.392897  |
| H | 2.685834  | -2.700195 | 0.691137  |
| H | -1.725212 | -0.744885 | 2.244168  |
| C | -1.567810 | -1.627973 | -2.383725 |
| H | -1.398831 | -0.710571 | -2.973239 |
| H | -1.078329 | -2.452721 | -2.918983 |
| C | 2.470769  | -1.682606 | 0.325213  |

#### FLP4

|   |           |           |           |
|---|-----------|-----------|-----------|
| C | 0.270858  | 0.650846  | -0.774613 |
| C | -1.096392 | 0.095985  | -0.348728 |
| C | -1.125358 | -1.450153 | -0.491735 |
| N | 0.243828  | -1.984789 | -0.266651 |
| C | 1.145484  | -1.307251 | 0.690056  |
| C | 1.377914  | 0.160579  | 0.187298  |
| H | 2.871204  | -2.097529 | -0.375131 |
| H | 1.401426  | -0.860132 | 2.821155  |
| C | 0.633084  | -1.291782 | 2.157251  |
| H | -0.275252 | -0.681643 | 2.259878  |
| H | 0.407980  | -2.308840 | 2.512981  |
| C | 2.476776  | -2.084136 | 0.650623  |
| H | 3.215500  | -1.609285 | 1.315872  |
| H | 2.338306  | -3.127783 | 0.981022  |
| H | -1.425681 | -2.915633 | -2.087267 |
| H | -1.954593 | -1.826102 | 1.511401  |



|   |           |           |           |
|---|-----------|-----------|-----------|
| C | -2.180612 | -2.059517 | 0.461664  |
| H | -3.185456 | -1.669569 | 0.226142  |
| H | -2.205608 | -3.155555 | 0.353656  |
| C | -1.496210 | -1.826946 | -1.944758 |
| H | -2.528755 | -1.517120 | -2.178705 |
| H | -0.806144 | -1.340750 | -2.650810 |
| H | 2.352482  | 0.229737  | -0.322594 |
| H | 1.429118  | 0.830514  | 1.061703  |
| H | -1.908838 | 0.524009  | -0.958081 |
| H | -1.296459 | 0.385106  | 0.696829  |
| H | 0.184374  | -2.976239 | -0.032551 |
| H | 0.254914  | 1.752519  | -0.800461 |
| H | 0.492385  | 0.303659  | -1.796044 |
| F | -4.953649 | -4.843049 | -2.673164 |
| H | 0.824546  | -4.019125 | -2.484303 |
| B | -0.498995 | -5.632046 | -0.594926 |
| H | -3.231383 | -4.924088 | -0.732771 |
| H | 0.557008  | -4.489414 | 1.708950  |
| C | -1.039737 | -5.728400 | 0.879555  |
| C | -2.225805 | -6.431362 | 1.205777  |
| C | -2.697259 | -6.422435 | 2.520409  |
| C | -2.055392 | -5.714410 | 3.544325  |
| C | -0.886720 | -5.024693 | 3.205329  |
| C | -0.361476 | -5.035688 | 1.913000  |
| H | -2.776419 | -6.984751 | 0.446544  |
| F | -3.824286 | -7.107486 | 2.824153  |
| H | -2.448690 | -5.703214 | 4.559116  |
| F | -0.248319 | -4.317959 | 4.169317  |
| C | 1.042747  | -5.429435 | -0.827889 |
| C | 1.987302  | -6.069557 | 0.013939  |
| C | 3.351668  | -5.857825 | -0.190414 |
| C | 3.834196  | -4.995098 | -1.181590 |
| C | 2.887203  | -4.351567 | -1.984092 |
| C | 1.514812  | -4.565675 | -1.846055 |
| H | 1.663965  | -6.730018 | 0.817493  |
| F | 4.247756  | -6.491095 | 0.603201  |
| H | 4.900443  | -4.818550 | -1.309868 |
| F | 3.327857  | -3.473722 | -2.915864 |
| C | -1.483499 | -5.665394 | -1.819565 |
| C | -1.020797 | -6.064959 | -3.098716 |
| C | -1.895831 | -6.061912 | -4.186635 |

|   |           |           |           |
|---|-----------|-----------|-----------|
| C | -3.230020 | -5.653782 | -4.074114 |
| C | -3.670636 | -5.252917 | -2.807764 |
| C | -2.836980 | -5.262809 | -1.688513 |
| H | 0.011672  | -6.377903 | -3.245752 |
| F | -1.445356 | -6.456348 | -5.400476 |
| H | -3.895016 | -5.644701 | -4.935694 |

#### FLP5

|   |           |           |           |
|---|-----------|-----------|-----------|
| C | 0.359881  | 0.674840  | -0.761304 |
| C | -1.037659 | 0.135110  | -0.420676 |
| C | -1.075486 | -1.412164 | -0.563996 |
| N | 0.277508  | -1.951667 | -0.279213 |
| C | 1.123175  | -1.298848 | 0.739173  |
| C | 1.402781  | 0.169738  | 0.263637  |
| H | 2.888145  | -2.142979 | -0.219182 |
| H | 1.258287  | -0.915360 | 2.897200  |
| C | 0.516254  | -1.289646 | 2.170824  |
| H | -0.367591 | -0.639311 | 2.231826  |
| H | 0.216721  | -2.306684 | 2.468540  |
| C | 2.442754  | -2.095071 | 0.784367  |
| H | 3.153331  | -1.614756 | 1.476364  |
| H | 2.271334  | -3.129051 | 1.126620  |
| H | -1.334135 | -2.881844 | -2.163581 |
| H | -2.015213 | -1.760050 | 1.397512  |
| C | -2.178594 | -2.012208 | 0.340853  |
| H | -3.171322 | -1.633203 | 0.042532  |
| H | -2.189422 | -3.109402 | 0.250000  |
| C | -1.384996 | -1.790705 | -2.030768 |
| H | -2.398187 | -1.459246 | -2.314476 |
| H | -0.651197 | -1.323571 | -2.705249 |
| H | 2.407123  | 0.230338  | -0.186636 |
| H | 1.408643  | 0.835116  | 1.143513  |
| H | -1.805594 | 0.573221  | -1.078863 |
| H | -1.298331 | 0.428001  | 0.610608  |
| H | 0.217460  | -2.952920 | -0.092932 |
| H | 0.358240  | 1.776988  | -0.786320 |
| H | 0.637835  | 0.325021  | -1.768005 |
| H | -4.776000 | -4.919340 | -2.617186 |
| H | 0.769237  | -4.098928 | -2.575020 |
| B | -0.507171 | -5.579646 | -0.570364 |
| H | -3.221625 | -4.889252 | -0.682222 |

|   |           |           |           |
|---|-----------|-----------|-----------|
| H | 0.522981  | -4.470180 | 1.765253  |
| C | -1.033898 | -5.710809 | 0.906389  |
| C | -2.194518 | -6.461530 | 1.226785  |
| C | -2.670869 | -6.551701 | 2.541688  |
| C | -2.006836 | -5.870812 | 3.576049  |
| C | -0.855897 | -5.117423 | 3.290804  |
| C | -0.373653 | -5.053944 | 1.977318  |
| H | -2.719257 | -6.987660 | 0.427108  |
| H | -3.560411 | -7.146246 | 2.761997  |
| H | -2.383547 | -5.929231 | 4.599786  |
| H | -0.336872 | -4.583534 | 4.090007  |
| C | 1.028410  | -5.359350 | -0.829675 |
| C | 2.006029  | -5.931743 | 0.026077  |
| C | 3.376413  | -5.751746 | -0.201550 |
| C | 3.807658  | -4.967769 | -1.285311 |
| C | 2.864016  | -4.374452 | -2.139200 |
| C | 1.495649  | -4.575980 | -1.917130 |
| H | 1.675091  | -6.534917 | 0.873916  |
| H | 4.108216  | -6.215101 | 0.464057  |
| H | 4.875403  | -4.815774 | -1.459362 |
| H | 3.195249  | -3.750864 | -2.972407 |
| C | -1.508078 | -5.637558 | -1.782018 |
| C | -1.082660 | -6.070065 | -3.065518 |
| C | -1.959971 | -6.106926 | -4.157245 |
| C | -3.292180 | -5.689794 | -3.999007 |
| C | -3.742884 | -5.251020 | -2.742866 |
| C | -2.864420 | -5.238010 | -1.651942 |
| H | -0.046847 | -6.388109 | -3.196813 |
| H | -1.607666 | -6.453864 | -5.131303 |
| H | -3.975652 | -5.705591 | -4.851122 |

**TS1a**

|   |           |           |           |
|---|-----------|-----------|-----------|
| C | -0.645715 | 1.888532  | -0.112033 |
| C | -1.492792 | 0.977929  | 0.790428  |
| C | -1.609074 | -0.447363 | 0.165386  |
| N | -0.376013 | -0.815290 | -0.599138 |
| C | 0.913794  | -0.185392 | -0.207104 |
| C | 0.815411  | 1.386353  | -0.182436 |
| H | 1.646353  | -0.303116 | -2.265249 |
| H | 2.380693  | -0.367581 | 1.380499  |
| C | 1.356201  | -0.715225 | 1.172604  |

|   |           |           |           |
|---|-----------|-----------|-----------|
| H | 0.710527  | -0.341424 | 1.979095  |
| H | 1.340962  | -1.812624 | 1.188146  |
| C | 1.950940  | -0.632245 | -1.256456 |
| H | 2.928316  | -0.176487 | -1.033491 |
| H | 2.058225  | -1.727007 | -1.263777 |
| H | -2.811574 | -1.435772 | -1.369760 |
| H | -1.048036 | -1.576307 | 1.967246  |
| C | -1.881995 | -1.501560 | 1.257445  |
| H | -2.788359 | -1.226524 | 1.822559  |
| H | -2.038086 | -2.486475 | 0.797751  |
| C | -2.779131 | -0.471905 | -0.840980 |
| H | -3.734326 | -0.330978 | -0.312922 |
| H | -2.674064 | 0.336676  | -1.583954 |
| H | 1.301790  | 1.808401  | -1.077965 |
| H | 1.374737  | 1.768555  | 0.688176  |
| H | -2.504424 | 1.391413  | 0.934256  |
| H | -1.029468 | 0.920841  | 1.789518  |
| H | 0.037727  | -2.784279 | -0.748025 |
| H | -0.669654 | 2.929911  | 0.245771  |
| H | -1.085876 | 1.893633  | -1.124539 |
| H | -0.531628 | -0.588695 | -1.583841 |
| F | 1.842803  | -4.684160 | -2.481595 |
| B | -0.163206 | -5.592216 | -0.536777 |
| F | -2.429535 | -3.877962 | -1.283612 |
| F | 0.875332  | -4.151684 | 1.786955  |
| C | -0.957103 | -5.337886 | 0.803445  |
| C | -2.288584 | -5.759559 | 0.995159  |
| C | -3.025519 | -5.463810 | 2.148384  |
| C | -2.429215 | -4.702955 | 3.165335  |
| C | -1.103192 | -4.270198 | 3.025549  |
| C | -0.393551 | -4.608791 | 1.869615  |
| F | -2.910468 | -6.496516 | 0.049760  |
| F | -4.291982 | -5.891772 | 2.289589  |
| F | -3.126355 | -4.388189 | 4.265663  |
| F | -0.541640 | -3.507301 | 3.980414  |
| C | 1.381815  | -5.917719 | -0.483870 |
| C | 1.947905  | -6.695199 | 0.546409  |
| C | 3.313502  | -6.998759 | 0.611813  |
| C | 4.172573  | -6.503301 | -0.380377 |
| C | 3.657577  | -5.718112 | -1.423295 |
| C | 2.283942  | -5.454473 | -1.463386 |

|   |           |           |           |
|---|-----------|-----------|-----------|
| F | 1.164377  | -7.207629 | 1.520355  |
| F | 3.807372  | -7.757112 | 1.605831  |
| F | 5.483553  | -6.777641 | -0.331868 |
| F | 4.483403  | -5.236954 | -2.368817 |
| C | -0.928528 | -5.634086 | -1.919275 |
| C | -0.565092 | -6.512235 | -2.960912 |
| C | -1.202915 | -6.525540 | -4.208313 |
| C | -2.247140 | -5.621832 | -4.454048 |
| C | -2.646650 | -4.727880 | -3.448803 |
| C | -1.998480 | -4.763447 | -2.210354 |
| F | 0.425603  | -7.411681 | -2.779803 |
| F | -0.828149 | -7.389316 | -5.167332 |
| F | -2.863582 | -5.613711 | -5.643823 |
| F | -3.642594 | -3.854540 | -3.682304 |
| H | 0.283342  | -3.502714 | -0.841553 |

**TS2a**

|   |           |           |           |
|---|-----------|-----------|-----------|
| C | 3.148399  | -4.111132 | -1.625490 |
| C | 1.778863  | -4.253554 | -1.386982 |
| H | -2.308468 | -0.505463 | 1.045912  |
| N | -0.481446 | -1.128033 | -0.803183 |
| C | 0.720884  | -0.679870 | -0.069269 |
| F | 1.790888  | -6.820749 | 1.179808  |
| F | -0.247944 | -5.065905 | 4.828705  |
| C | 1.237496  | -5.134127 | -0.430517 |
| F | -2.481370 | -7.212050 | 0.305821  |
| F | -3.382139 | -7.964802 | 2.735091  |
| F | -2.278483 | -6.903123 | 5.010915  |
| C | 2.186065  | -5.906127 | 0.269489  |
| C | 3.569108  | -5.801744 | 0.057703  |
| C | 4.053925  | -4.891605 | -0.891183 |
| F | -1.472150 | -6.067145 | -4.996829 |
| C | -3.095062 | -4.982166 | -3.640166 |
| C | -3.483864 | -4.500881 | -2.381314 |
| C | -2.610930 | -4.644804 | -1.297987 |
| F | 0.209011  | -6.285481 | -2.897159 |
| F | -3.920120 | -4.862781 | -4.691102 |
| F | -4.676706 | -3.897015 | -2.230793 |
| H | -0.548489 | -3.447985 | 0.300817  |
| F | 4.431135  | -6.564943 | 0.750596  |
| F | 5.371505  | -4.775146 | -1.106184 |

|   |           |           |           |
|---|-----------|-----------|-----------|
| F | 3.605279  | -3.240491 | -2.546826 |
| C | -1.325003 | -5.205942 | -1.410281 |
| H | -0.682254 | -2.734015 | -0.014719 |
| C | -0.985775 | -5.687921 | -2.688173 |
| C | -1.840566 | -5.590114 | -3.794432 |
| H | -0.191875 | -1.495411 | -1.710662 |
| F | 0.957736  | -3.468678 | -2.134550 |
| B | -0.331010 | -5.240447 | -0.172356 |
| F | -3.037035 | -4.161935 | -0.107970 |
| F | 0.671041  | -4.296394 | 2.401463  |
| C | -0.868640 | -5.709722 | 1.244817  |
| C | -1.910388 | -6.645449 | 1.391867  |
| C | -2.392101 | -7.059445 | 2.641564  |
| C | -1.827340 | -6.522023 | 3.806795  |
| C | -0.787166 | -5.584346 | 3.710795  |
| C | -0.326433 | -5.208497 | 2.444810  |
| C | -1.636617 | -0.210746 | -1.009988 |
| C | -1.301433 | 0.961869  | -1.961688 |
| H | -2.212540 | 1.547043  | -2.167650 |
| H | -0.545061 | 1.629685  | -1.529027 |
| H | -0.912279 | 0.579046  | -2.918988 |
| C | -2.744129 | -1.077702 | -1.644738 |
| H | -2.389077 | -1.525923 | -2.588254 |
| H | -3.624181 | -0.457814 | -1.874757 |
| H | -3.046023 | -1.884740 | -0.965202 |
| C | -2.122486 | 0.325408  | 0.347677  |
| H | -1.391536 | 1.014253  | 0.798449  |
| H | -3.061001 | 0.881767  | 0.203360  |
| H | 1.271698  | -1.602229 | 0.183071  |
| H | 0.395533  | -0.236604 | 0.881314  |
| H | 1.359171  | 1.918641  | 0.560308  |
| C | 1.641031  | 0.274011  | -0.814077 |
| C | 2.289802  | -0.153369 | -1.988439 |
| C | 3.121731  | 0.721839  | -2.700158 |
| C | 3.319733  | 2.035473  | -2.242215 |
| C | 2.687885  | 2.465282  | -1.064923 |
| C | 1.854533  | 1.585921  | -0.355907 |
| H | 2.152363  | -1.177393 | -2.338972 |
| H | 3.622506  | 0.376629  | -3.607124 |
| H | 3.968284  | 2.717009  | -2.796305 |
| H | 2.843088  | 3.482536  | -0.699185 |

**TS3a**

|   |           |           |           |
|---|-----------|-----------|-----------|
| H | 0.867416  | 1.185488  | 2.003362  |
| F | -4.917049 | -7.751418 | -0.839343 |
| F | -5.845023 | -6.837154 | 1.576340  |
| H | 1.563814  | -1.948500 | 2.012804  |
| F | 3.686994  | -3.505728 | 1.619076  |
| C | -0.297260 | -5.111747 | -1.850403 |
| C | 0.887825  | -5.589401 | -2.437953 |
| C | 1.175027  | -5.444541 | -3.803692 |
| C | 0.254812  | -4.790374 | -4.634766 |
| C | -0.944586 | -4.303193 | -4.094134 |
| C | -1.200746 | -4.492460 | -2.732608 |
| F | 1.813690  | -6.232496 | -1.693283 |
| F | 2.320714  | -5.921860 | -4.322189 |
| F | 0.520140  | -4.627905 | -5.940258 |
| F | -4.294110 | -5.159922 | 3.099022  |
| C | 0.597109  | -5.322219 | 0.745204  |
| C | 0.638002  | -6.283820 | 1.770615  |
| C | 1.671137  | -6.349608 | 2.717376  |
| C | 2.711213  | -5.411345 | 2.665608  |
| C | 2.716448  | -4.441961 | 1.652794  |
| C | 1.683100  | -4.431502 | 0.710889  |
| F | -0.334625 | -7.216322 | 1.876069  |
| F | -1.821911 | -3.649255 | -4.878718 |
| H | -0.936829 | -3.568524 | -0.070502 |
| F | 1.669018  | -7.292249 | 3.676759  |
| F | 3.695612  | -5.440417 | 3.577404  |
| H | -0.692279 | -2.794618 | -0.128504 |
| C | -3.839659 | -5.603797 | 1.912830  |
| C | -2.578708 | -5.230793 | 1.435505  |
| F | -2.480953 | -7.010476 | -1.731789 |
| F | 1.738699  | -3.470649 | -0.241296 |
| B | -0.613477 | -5.196312 | -0.289177 |
| F | -2.370871 | -3.999588 | -2.259621 |
| F | -1.846494 | -4.404446 | 2.223473  |
| C | -2.062436 | -5.656085 | 0.197744  |
| C | -2.893241 | -6.514426 | -0.543764 |
| C | -4.159146 | -6.922294 | -0.099096 |
| C | -4.634684 | -6.460248 | 1.135857  |
| C | 0.257637  | 1.577294  | -0.048015 |

|   |           |           |           |
|---|-----------|-----------|-----------|
| C | -0.213998 | 0.993320  | -1.231643 |
| C | -0.450594 | -0.391127 | -1.260755 |
| N | -0.226941 | -1.154460 | -0.169381 |
| C | 0.243508  | -0.614661 | 0.972750  |
| C | 0.492968  | 0.766951  | 1.068284  |
| H | -0.400312 | 1.592802  | -2.123465 |
| H | -1.886298 | -1.623656 | -2.305996 |
| H | 0.442107  | 2.652291  | 0.001088  |
| C | 0.538514  | -1.558266 | 2.115139  |
| H | 0.468743  | -1.040318 | 3.082962  |
| H | -0.150159 | -2.413685 | 2.109057  |
| C | -0.938807 | -1.101688 | -2.499742 |
| H | -1.082764 | -0.397361 | -3.331051 |
| H | -0.207607 | -1.866432 | -2.805014 |

#### **TS4a**

|   |           |           |           |
|---|-----------|-----------|-----------|
| C | -0.764304 | 1.618904  | -0.428660 |
| C | -1.983682 | 0.754120  | -0.074009 |
| C | -1.835935 | -0.676693 | -0.675322 |
| N | -0.388403 | -1.088426 | -0.713801 |
| C | 0.558411  | -0.498494 | 0.282945  |
| C | 0.514346  | 1.071346  | 0.248004  |
| H | 2.218006  | -0.705633 | -1.130694 |
| H | 1.012981  | -0.732039 | 2.388926  |
| C | 0.214956  | -1.027725 | 1.690486  |
| H | -0.729247 | -0.613558 | 2.067918  |
| H | 0.139985  | -2.124222 | 1.681165  |
| C | 1.961405  | -1.008196 | -0.100696 |
| H | 2.710310  | -0.569812 | 0.576343  |
| H | 2.018701  | -2.104807 | -0.028605 |
| H | -2.141308 | -1.645884 | -2.622833 |
| H | -2.301106 | -1.769734 | 1.173259  |
| C | -2.657348 | -1.694691 | 0.138758  |
| H | -3.711402 | -1.374481 | 0.158924  |
| H | -2.606235 | -2.698361 | -0.305266 |
| C | -2.333115 | -0.677479 | -2.135922 |
| H | -3.416252 | -0.487271 | -2.160436 |
| H | -1.832442 | 0.112257  | -2.721317 |
| H | 1.401002  | 1.459583  | -0.279662 |
| H | 0.571751  | 1.448815  | 1.282278  |
| H | -2.914218 | 1.204040  | -0.455409 |



|   |           |           |           |
|---|-----------|-----------|-----------|
| H | -2.084767 | 0.696388  | 1.022258  |
| H | -0.166434 | -2.722477 | -0.534588 |
| H | -0.926543 | 2.666480  | -0.131471 |
| H | -0.633541 | 1.619147  | -1.524572 |
| H | -0.017370 | -0.888924 | -1.645725 |
| H | 2.341320  | -4.502163 | -1.336982 |
| B | -0.234103 | -5.150490 | -0.422103 |
| H | -2.038674 | -3.819211 | -2.098947 |
| H | -0.509378 | -4.300966 | 2.239050  |
| C | -1.529976 | -5.153502 | 0.508764  |
| C | -2.783812 | -5.596299 | 0.031637  |
| C | -3.910082 | -5.521883 | 0.857350  |
| C | -3.858378 | -5.007956 | 2.156519  |
| C | -2.607485 | -4.576956 | 2.614252  |
| C | -1.456613 | -4.650297 | 1.829549  |
| H | -2.889878 | -5.990592 | -0.978001 |
| F | -5.106152 | -5.951868 | 0.383483  |
| H | -4.746703 | -4.947482 | 2.782242  |
| F | -2.523898 | -4.063509 | 3.868384  |
| C | 1.183662  | -5.519723 | 0.209415  |
| C | 1.287880  | -6.288555 | 1.390424  |
| C | 2.549132  | -6.607060 | 1.904349  |
| C | 3.736904  | -6.179581 | 1.303290  |
| C | 3.614837  | -5.415739 | 0.136088  |
| C | 2.377013  | -5.089339 | -0.419484 |
| H | 0.397273  | -6.642436 | 1.908103  |
| F | 2.632670  | -7.352341 | 3.034702  |
| H | 4.709977  | -6.429753 | 1.721543  |
| F | 4.749749  | -4.982992 | -0.469936 |
| C | -0.420263 | -5.275269 | -2.002756 |
| C | 0.380848  | -6.139024 | -2.780840 |
| C | 0.193774  | -6.200934 | -4.166240 |
| C | -0.750000 | -5.415688 | -4.836654 |
| C | -1.529946 | -4.561322 | -4.048231 |
| C | -1.394048 | -4.490856 | -2.663046 |
| H | 1.149821  | -6.756735 | -2.318409 |
| F | 0.965812  | -7.041261 | -4.899542 |
| H | -0.869081 | -5.465310 | -5.917269 |
| F | -2.445107 | -3.763821 | -4.661986 |
| H | 0.005241  | -3.513580 | -0.393212 |

**TS5a**

|   |           |           |           |
|---|-----------|-----------|-----------|
| C | -0.621531 | 1.565025  | -0.594317 |
| C | -1.890236 | 0.776850  | -0.233591 |
| C | -1.785369 | -0.693262 | -0.732457 |
| N | -0.343876 | -1.157391 | -0.687946 |
| C | 0.588118  | -0.545158 | 0.320060  |
| C | 0.606471  | 1.016028  | 0.171140  |
| H | 2.293510  | -0.913506 | -1.001362 |
| H | 0.932639  | -0.669675 | 2.451487  |
| C | 0.151321  | -0.968159 | 1.735814  |
| H | -0.784833 | -0.480450 | 2.037699  |
| H | 0.018602  | -2.057913 | 1.789227  |
| C | 1.978607  | -1.141005 | 0.031932  |
| H | 2.716371  | -0.694186 | 0.715663  |
| H | 1.981556  | -2.232229 | 0.171154  |
| H | -2.018345 | -1.793680 | -2.606128 |
| H | -2.364835 | -1.637143 | 1.167733  |
| C | -2.664820 | -1.632852 | 0.113004  |
| H | -3.710182 | -1.290585 | 0.053255  |
| H | -2.610784 | -2.667905 | -0.249678 |
| C | -2.215168 | -0.785824 | -2.209886 |
| H | -3.291813 | -0.577648 | -2.296918 |
| H | -1.670617 | -0.049818 | -2.825599 |
| H | 1.528155  | 1.331544  | -0.344727 |
| H | 0.639173  | 1.463117  | 1.178293  |
| H | -2.784516 | 1.237252  | -0.682997 |
| H | -2.036061 | 0.796717  | 0.858630  |
| H | -0.266655 | -2.618563 | -0.485836 |
| H | -0.749808 | 2.636248  | -0.375579 |
| H | -0.448924 | 1.484384  | -1.681599 |
| H | 0.070707  | -1.008721 | -1.613027 |
| H | 2.203466  | -4.205376 | -1.313475 |
| B | -0.332782 | -4.947743 | -0.401518 |
| H | -2.407003 | -3.968698 | -2.011037 |
| H | -0.588259 | -4.183562 | 2.261133  |
| C | -1.594106 | -5.109017 | 0.583896  |
| C | -2.812212 | -5.703802 | 0.184903  |
| C | -3.909287 | -5.801200 | 1.057967  |
| C | -3.816761 | -5.296672 | 2.363806  |
| C | -2.614112 | -4.708111 | 2.793068  |
| C | -1.525810 | -4.626309 | 1.913863  |

|   |           |           |           |
|---|-----------|-----------|-----------|
| H | -2.899496 | -6.096891 | -0.829982 |
| H | -4.836335 | -6.270218 | 0.717801  |
| H | -4.669686 | -5.365313 | 3.043555  |
| H | -2.527678 | -4.319625 | 3.811444  |
| C | 1.116903  | -5.337960 | 0.177285  |
| C | 1.281694  | -6.180871 | 1.299490  |
| C | 2.554383  | -6.518607 | 1.789620  |
| C | 3.705865  | -6.009045 | 1.170113  |
| C | 3.573662  | -5.168441 | 0.051282  |
| C | 2.297445  | -4.848881 | -0.434049 |
| H | 0.392788  | -6.577378 | 1.794653  |
| H | 2.647133  | -7.177239 | 2.657222  |
| H | 4.697135  | -6.264678 | 1.552586  |
| H | 4.464079  | -4.768291 | -0.441191 |
| C | -0.577716 | -5.127376 | -1.982588 |
| C | 0.297955  | -5.869260 | -2.807444 |
| C | 0.084039  | -5.997574 | -4.190354 |
| C | -1.019636 | -5.376035 | -4.794140 |
| C | -1.913231 | -4.636982 | -3.999963 |
| C | -1.691385 | -4.526460 | -2.619705 |
| H | 1.164996  | -6.353243 | -2.353411 |
| H | 0.780269  | -6.582808 | -4.796862 |
| H | -1.186351 | -5.470188 | -5.870043 |
| H | -2.783226 | -4.156046 | -4.455604 |
| H | -0.179765 | -3.481021 | -0.323880 |

**[TMPH]<sup>+</sup>[HB(C<sub>6</sub>F<sub>5</sub>)<sub>3</sub>]<sup>-</sup>**

|   |           |           |           |
|---|-----------|-----------|-----------|
| C | 0.489783  | 0.947834  | -0.808414 |
| C | -0.911333 | 0.602535  | -0.279514 |
| C | -1.176293 | -0.919076 | -0.355225 |
| N | 0.157537  | -1.666466 | -0.049381 |
| C | 1.250576  | -0.977789 | 0.783692  |
| C | 1.602153  | 0.384204  | 0.110130  |
| H | 2.824205  | -2.075234 | -0.267592 |
| H | 1.580850  | -0.403621 | 2.826427  |
| C | 0.747658  | -0.797585 | 2.226106  |
| H | -0.079413 | -0.079773 | 2.290346  |
| H | 0.429349  | -1.753096 | 2.661329  |
| C | 2.454721  | -1.935600 | 0.758767  |
| H | 3.265777  | -1.494597 | 1.356710  |
| H | 2.193350  | -2.914261 | 1.184490  |

|   |           |           |           |
|---|-----------|-----------|-----------|
| H | -1.698942 | -2.414405 | -1.859215 |
| H | -1.917493 | -1.202020 | 1.688566  |
| C | -2.229624 | -1.395808 | 0.653088  |
| H | -3.164994 | -0.848433 | 0.464511  |
| H | -2.425181 | -2.469498 | 0.521428  |
| C | -1.582929 | -1.328162 | -1.782507 |
| H | -2.547667 | -0.855120 | -2.015576 |
| H | -0.841112 | -0.989020 | -2.522107 |
| H | 2.530689  | 0.277008  | -0.471425 |
| H | 1.813786  | 1.103235  | 0.916120  |
| H | -1.687254 | 1.101198  | -0.879322 |
| H | -1.024658 | 0.966161  | 0.753360  |
| H | -0.080239 | -2.573200 | 0.390571  |
| H | 0.609181  | 2.036836  | -0.902596 |
| H | 0.600900  | 0.532270  | -1.823586 |
| H | 0.576866  | -1.950688 | -0.947742 |
| F | 1.006847  | -3.228973 | -2.239801 |
| B | -0.686911 | -5.106512 | -0.691180 |
| F | -3.349974 | -4.115514 | -1.289381 |
| F | 0.001113  | -3.878430 | 1.841048  |
| C | -1.135474 | -5.706347 | 0.776798  |
| C | -1.879358 | -6.874614 | 1.005878  |
| C | -2.267305 | -7.302576 | 2.286693  |
| C | -1.890227 | -6.557784 | 3.413515  |
| C | -1.128370 | -5.394632 | 3.240909  |
| C | -0.776169 | -5.023569 | 1.939886  |
| F | -2.257812 | -7.660621 | -0.027047 |
| F | -2.989409 | -8.428049 | 2.450012  |
| F | -2.253307 | -6.954659 | 4.647392  |
| F | -0.746741 | -4.660111 | 4.309102  |
| C | 0.935408  | -5.260513 | -0.942055 |
| C | 1.721271  | -6.307955 | -0.430664 |
| C | 3.117738  | -6.367085 | -0.561035 |
| C | 3.793520  | -5.343711 | -1.242324 |
| C | 3.052441  | -4.296515 | -1.800989 |
| C | 1.661024  | -4.301189 | -1.652066 |
| F | 1.138123  | -7.332786 | 0.229728  |
| F | 3.820722  | -7.389224 | -0.037188 |
| F | 5.134270  | -5.366520 | -1.356635 |
| F | 3.681287  | -3.267743 | -2.418448 |
| C | -1.614971 | -5.641353 | -1.927322 |

|   |           |           |           |
|---|-----------|-----------|-----------|
| C | -1.260452 | -6.657231 | -2.826185 |
| C | -2.086618 | -7.079563 | -3.879050 |
| C | -3.343957 | -6.483546 | -4.047415 |
| C | -3.752641 | -5.475985 | -3.163176 |
| C | -2.888517 | -5.091874 | -2.129189 |
| F | -0.071258 | -7.297030 | -2.700055 |
| F | -1.693957 | -8.056702 | -4.722017 |
| F | -4.153147 | -6.874596 | -5.050937 |
| F | -4.964118 | -4.898186 | -3.314259 |
| H | -0.905337 | -3.906295 | -0.618195 |

**[btamH]<sup>+</sup>[ B(C<sub>6</sub>F<sub>5</sub>)<sub>3</sub>]<sup>-</sup>**

|   |           |           |           |
|---|-----------|-----------|-----------|
| C | 2.511705  | -4.043116 | -2.387423 |
| C | 1.161819  | -4.129633 | -2.024521 |
| H | -0.747873 | -1.345993 | 2.332347  |
| N | -0.039022 | -1.785469 | -0.205891 |
| C | 1.428285  | -1.499729 | 0.075756  |
| F | 1.296543  | -6.482002 | 0.715375  |
| F | -0.717113 | -4.328205 | 4.260738  |
| C | 0.661849  | -4.920058 | -0.980673 |
| F | -2.906189 | -7.224226 | 0.153551  |
| F | -3.587295 | -7.781615 | 2.681375  |
| F | -2.525277 | -6.357204 | 4.777648  |
| C | 1.641655  | -5.661084 | -0.299861 |
| C | 3.011692  | -5.601766 | -0.608316 |
| C | 3.451891  | -4.787439 | -1.661701 |
| F | -1.355135 | -9.103774 | -3.606636 |
| C | -2.623204 | -7.194499 | -4.250858 |
| C | -3.016213 | -5.872537 | -4.004271 |
| C | -2.510704 | -5.207135 | -2.876040 |
| F | -0.399345 | -7.768171 | -1.431594 |
| F | -3.096446 | -7.852207 | -5.327246 |
| F | -3.869216 | -5.258073 | -4.852427 |
| H | -1.391727 | -3.841002 | -0.804657 |
| F | 3.909572  | -6.323658 | 0.088202  |
| F | 4.757812  | -4.722828 | -1.976231 |
| F | 2.915811  | -3.245617 | -3.402091 |
| C | -1.625166 | -5.801534 | -1.968820 |
| H | -0.237492 | -2.694467 | 0.245397  |
| C | -1.256575 | -7.121714 | -2.261943 |
| C | -1.734172 | -7.830680 | -3.370817 |

|                                                                                   |           |           |           |
|-----------------------------------------------------------------------------------|-----------|-----------|-----------|
| H                                                                                 | -0.158795 | -1.976370 | -1.210670 |
| F                                                                                 | 0.299902  | -3.322025 | -2.739693 |
| B                                                                                 | -0.973559 | -4.981134 | -0.715634 |
| F                                                                                 | -2.928771 | -3.921362 | -2.699455 |
| F                                                                                 | 0.026416  | -3.774416 | 1.744661  |
| C                                                                                 | -1.395348 | -5.474723 | 0.800071  |
| C                                                                                 | -2.314140 | -6.488608 | 1.121455  |
| C                                                                                 | -2.698712 | -6.798916 | 2.438732  |
| C                                                                                 | -2.160276 | -6.078844 | 3.512537  |
| C                                                                                 | -1.242519 | -5.053430 | 3.249294  |
| C                                                                                 | -0.895398 | -4.801227 | 1.920042  |
| C                                                                                 | -1.137202 | -0.801366 | 0.255020  |
| C                                                                                 | -1.141220 | 0.429836  | -0.661757 |
| H                                                                                 | -2.008657 | 1.050652  | -0.392408 |
| H                                                                                 | -0.231467 | 1.032260  | -0.556055 |
| H                                                                                 | -1.251411 | 0.131476  | -1.716136 |
| C                                                                                 | -2.463718 | -1.573113 | 0.124272  |
| H                                                                                 | -2.630039 | -1.928395 | -0.902682 |
| H                                                                                 | -3.283589 | -0.895733 | 0.405064  |
| H                                                                                 | -2.482012 | -2.448086 | 0.790014  |
| C                                                                                 | -0.865361 | -0.438515 | 1.720767  |
| H                                                                                 | 0.030995  | 0.190545  | 1.822362  |
| H                                                                                 | -1.724592 | 0.130111  | 2.103712  |
| H                                                                                 | 1.932099  | -2.435577 | -0.199413 |
| H                                                                                 | 1.515061  | -1.365292 | 1.158737  |
| H                                                                                 | 2.390150  | 0.844160  | 1.079359  |
| C                                                                                 | 1.964117  | -0.321657 | -0.693786 |
| C                                                                                 | 2.007835  | -0.357360 | -2.100539 |
| C                                                                                 | 2.478100  | 0.752271  | -2.815339 |
| C                                                                                 | 2.917529  | 1.898494  | -2.131986 |
| C                                                                                 | 2.892088  | 1.930863  | -0.728828 |
| C                                                                                 | 2.414519  | 0.822920  | -0.012848 |
| H                                                                                 | 1.682403  | -1.248151 | -2.637249 |
| H                                                                                 | 2.509771  | 0.717848  | -3.905516 |
| H                                                                                 | 3.285856  | 2.760201  | -2.691375 |
| H                                                                                 | 3.241757  | 2.815026  | -0.193066 |
| <b>[LutH]<sup>+</sup>[HB(C<sub>6</sub>F<sub>5</sub>)<sub>3</sub>]<sup>-</sup></b> |           |           |           |
| F                                                                                 | -2.042813 | -7.391222 | 0.124354  |
| F                                                                                 | -3.075911 | -8.000632 | 2.543332  |
| F                                                                                 | -2.750795 | -6.287192 | 4.666942  |

|   |           |           |           |
|---|-----------|-----------|-----------|
| F | -1.364416 | -3.930004 | 4.320221  |
| C | 1.075589  | -5.194890 | -0.654704 |
| C | 1.667008  | -6.367055 | -0.156215 |
| C | -1.787613 | -6.554656 | -3.988049 |
| C | 3.051124  | -6.599716 | -0.159504 |
| C | 3.912566  | -5.628410 | -0.690843 |
| C | 3.367032  | -4.457063 | -1.228997 |
| C | -2.403794 | -6.844669 | 2.373637  |
| C | -3.133830 | -6.169568 | -4.006765 |
| C | -3.642639 | -5.402028 | -2.949759 |
| C | -2.786245 | -5.044113 | -1.901615 |
| F | -1.292417 | -7.293856 | -5.001692 |
| C | -2.239291 | -5.974976 | 3.460924  |
| C | -1.533494 | -4.778368 | 3.281893  |
| C | 1.977137  | -4.289026 | -1.221507 |
| C | -1.015428 | -4.486122 | 2.013460  |
| F | -3.931804 | -6.528423 | -5.030854 |
| F | -4.939078 | -5.023937 | -2.954732 |
| H | -0.646286 | -3.641589 | -0.609213 |
| C | -1.428552 | -5.393686 | -1.835918 |
| F | 0.892741  | -7.349397 | 0.357871  |
| F | 3.565283  | -7.739118 | 0.343033  |
| F | 5.245212  | -5.818583 | -0.683143 |
| C | -1.860793 | -6.500915 | 1.126288  |
| F | 4.177707  | -3.484816 | -1.713860 |
| C | -0.969868 | -6.166794 | -2.912880 |
| F | 0.318577  | -6.586799 | -2.968190 |
| F | 1.520234  | -3.122854 | -1.784104 |
| B | -0.531839 | -4.872128 | -0.565555 |
| F | -3.342943 | -4.310600 | -0.891213 |
| F | -0.334629 | -3.294488 | 1.910053  |
| C | -1.154888 | -5.310713 | 0.892267  |
| C | 0.090665  | 1.400949  | 0.077566  |
| C | -1.031403 | 0.798385  | -0.509520 |
| C | -1.076902 | -0.592516 | -0.640631 |
| N | -0.010773 | -1.308799 | -0.188184 |
| C | 1.106518  | -0.778735 | 0.376841  |
| C | 1.160721  | 0.613107  | 0.520711  |
| H | -1.873841 | 1.389740  | -0.864520 |
| H | -2.651721 | -2.056233 | -0.515655 |
| H | 2.882387  | -1.875862 | -0.089834 |

|   |           |           |           |
|---|-----------|-----------|-----------|
| H | 2.042908  | 1.060176  | 0.976333  |
| H | -0.093751 | -2.352887 | -0.285798 |
| H | 0.130807  | 2.485532  | 0.188153  |
| C | -2.215273 | -1.360789 | -1.245912 |
| H | -2.990454 | -0.670024 | -1.601858 |
| H | -1.862142 | -1.980242 | -2.084643 |
| C | 2.219303  | -1.704326 | 0.772227  |
| H | 2.808909  | -1.256598 | 1.583605  |
| H | 1.828075  | -2.677108 | 1.093232  |

[TMPH]<sup>+</sup>[B(C<sub>6</sub>F<sub>2</sub>H<sub>3</sub>)<sub>3</sub>]<sup>-</sup>

|   |           |           |           |
|---|-----------|-----------|-----------|
| C | 1.380957  | -0.027863 | -1.540076 |
| C | -0.116128 | 0.233050  | -1.764009 |
| C | -0.953393 | -1.036101 | -1.470652 |
| N | -0.238976 | -1.831997 | -0.337935 |
| C | 0.577932  | -1.056903 | 0.716204  |
| C | 1.675297  | -0.239614 | -0.037414 |
| H | 1.892370  | -2.762564 | 1.071500  |
| H | 0.199808  | 0.251298  | 2.376901  |
| C | -0.369369 | -0.164546 | 1.532606  |
| H | -0.766392 | 0.675725  | 0.949729  |
| H | -1.207014 | -0.750720 | 1.941833  |
| C | 1.226175  | -2.100209 | 1.637116  |
| H | 1.823414  | -1.562222 | 2.388767  |
| H | 0.472076  | -2.717527 | 2.144536  |
| H | -1.460344 | -2.912889 | -2.481985 |
| H | -2.422604 | -0.100120 | -0.125351 |
| C | -2.388484 | -0.702400 | -1.041577 |
| H | -2.852208 | -0.116516 | -1.849492 |
| H | -2.985281 | -1.613356 | -0.903028 |
| C | -0.979271 | -1.952652 | -2.706267 |
| H | -1.559146 | -1.448325 | -3.492694 |
| H | 0.036501  | -2.134218 | -3.087255 |
| H | 2.644223  | -0.749073 | 0.072401  |
| H | 1.763770  | 0.738101  | 0.461473  |
| H | -0.316429 | 0.527391  | -2.805088 |
| H | -0.446069 | 1.068481  | -1.126099 |
| H | -0.910194 | -2.463895 | 0.135913  |
| H | 1.980303  | 0.814353  | -1.915340 |
| H | 1.695292  | -0.916632 | -2.110580 |
| H | 0.423356  | -2.513015 | -0.770838 |



|   |           |            |           |
|---|-----------|------------|-----------|
| H | 0.470404  | -4.093530  | -2.140292 |
| B | -0.606601 | -5.142588  | 0.336596  |
| H | -3.053357 | -3.767869  | 0.352206  |
| H | -0.333708 | -5.552103  | 3.128605  |
| C | -0.777186 | -6.506389  | 1.218048  |
| C | -1.084354 | -7.747003  | 0.617063  |
| C | -1.158276 | -8.905001  | 1.394271  |
| C | -0.937403 | -8.905065  | 2.776492  |
| C | -0.637494 | -7.669358  | 3.357068  |
| C | -0.558041 | -6.487721  | 2.613705  |
| H | -1.278834 | -7.817599  | -0.453757 |
| F | -1.457924 | -10.090030 | 0.794589  |
| H | -1.002648 | -9.816500  | 3.367489  |
| F | -0.421630 | -7.623963  | 4.701682  |
| C | 0.943950  | -4.958582  | -0.194029 |
| C | 2.037906  | -5.302985  | 0.632687  |
| C | 3.336721  | -4.920053  | 0.288708  |
| C | 3.637873  | -4.170221  | -0.860303 |
| C | 2.557376  | -3.878701  | -1.693149 |
| C | 1.247606  | -4.273041  | -1.399548 |
| H | 1.872810  | -5.849602  | 1.561758  |
| F | 4.365881  | -5.252247  | 1.108390  |
| H | 4.655321  | -3.867513  | -1.099087 |
| F | 2.779215  | -3.147647  | -2.829575 |
| C | -1.723225 | -5.008323  | -0.845456 |
| C | -1.593355 | -5.626674  | -2.111675 |
| C | -2.579331 | -5.456963  | -3.088757 |
| C | -3.722919 | -4.674567  | -2.883132 |
| C | -3.846493 | -4.083283  | -1.623036 |
| C | -2.886895 | -4.237811  | -0.619541 |
| H | -0.715650 | -6.228693  | -2.349495 |
| F | -2.424459 | -6.052699  | -4.299656 |
| H | -4.473166 | -4.539636  | -3.659566 |
| F | -4.927252 | -3.284985  | -1.383770 |
| H | -0.797048 | -4.176257  | 1.116960  |

**[TMPH]<sup>+</sup>[HB(C<sub>6</sub>H<sub>5</sub>)<sub>3</sub>]<sup>-</sup>**

|   |           |           |           |
|---|-----------|-----------|-----------|
| C | 1.193713  | 0.313622  | -1.455114 |
| C | -0.342182 | 0.361487  | -1.470578 |
| C | -0.943997 | -1.051003 | -1.262953 |
| N | 0.017445  | -1.856130 | -0.360849 |

|   |           |           |           |
|---|-----------|-----------|-----------|
| C | 0.860787  | -1.123308 | 0.687418  |
| C | 1.716173  | -0.039838 | -0.043267 |
| H | 2.406575  | -2.670273 | 0.591690  |
| H | 0.547261  | -0.147407 | 2.577729  |
| C | -0.072313 | -0.517949 | 1.747561  |
| H | -0.654030 | 0.327752  | 1.358837  |
| H | -0.759171 | -1.281862 | 2.142720  |
| C | 1.757243  | -2.189711 | 1.336375  |
| H | 2.389880  | -1.695025 | 2.089217  |
| H | 1.156271  | -2.969139 | 1.824073  |
| H | -1.366975 | -2.847574 | -2.440063 |
| H | -2.329328 | -0.512853 | 0.359701  |
| C | -2.336281 | -1.006956 | -0.619785 |
| H | -3.001814 | -0.437743 | -1.286518 |
| H | -2.741898 | -2.022949 | -0.517890 |
| C | -1.024382 | -1.815233 | -2.596742 |
| H | -1.745990 | -1.303037 | -3.249503 |
| H | -0.046889 | -1.830069 | -3.104684 |
| H | 2.758495  | -0.385876 | -0.116711 |
| H | 1.720404  | 0.867677  | 0.580945  |
| H | -0.718149 | 0.750981  | -2.428675 |
| H | -0.695873 | 1.047059  | -0.683554 |
| H | -0.496620 | -2.658405 | 0.115475  |
| H | 1.617632  | 1.276739  | -1.775611 |
| H | 1.540705  | -0.441347 | -2.181525 |
| H | 0.685285  | -2.376690 | -0.959080 |
| H | 0.575895  | -4.044619 | -2.310628 |
| B | -0.662857 | -5.011910 | 0.111326  |
| H | -3.297458 | -4.121693 | 0.098123  |
| H | -0.647476 | -4.928418 | 2.943874  |
| C | -0.928279 | -6.188047 | 1.208606  |
| C | -1.200812 | -7.516421 | 0.808518  |
| C | -1.374008 | -8.551642 | 1.739971  |
| C | -1.279609 | -8.284318 | 3.116417  |
| C | -1.014525 | -6.974140 | 3.544955  |
| C | -0.845317 | -5.949161 | 2.598487  |
| H | -1.287103 | -7.736229 | -0.259582 |
| H | -1.586012 | -9.567865 | 1.395262  |
| H | -1.416586 | -9.086985 | 3.845755  |
| H | -0.945317 | -6.751488 | 4.613920  |
| C | 0.912760  | -4.953540 | -0.371231 |

|   |           |           |           |
|---|-----------|-----------|-----------|
| C | 1.952134  | -5.407528 | 0.475504  |
| C | 3.309553  | -5.213478 | 0.173313  |
| C | 3.688755  | -4.549468 | -1.006340 |
| C | 2.688800  | -4.121196 | -1.894040 |
| C | 1.333639  | -4.338534 | -1.580176 |
| H | 1.679515  | -5.912245 | 1.405222  |
| H | 4.077298  | -5.574574 | 0.863353  |
| H | 4.744275  | -4.391047 | -1.240431 |
| H | 2.962151  | -3.640693 | -2.838608 |
| C | -1.754823 | -5.044479 | -1.101045 |
| C | -1.511271 | -5.613621 | -2.372989 |
| C | -2.485349 | -5.625382 | -3.387610 |
| C | -3.752825 | -5.069686 | -3.154817 |
| C | -4.039928 | -4.526170 | -1.890755 |
| C | -3.055790 | -4.525878 | -0.890572 |
| H | -0.530212 | -6.050500 | -2.575874 |
| H | -2.254645 | -6.070183 | -4.359830 |
| H | -4.510815 | -5.070200 | -3.942112 |
| H | -5.030597 | -4.109681 | -1.686568 |
| H | -0.877154 | -3.924081 | 0.757759  |

**TS1b**

|   |           |           |           |
|---|-----------|-----------|-----------|
| C | -0.854464 | 2.425328  | -1.652180 |
| C | -2.141433 | 2.077690  | -0.866728 |
| C | -2.050774 | 0.766989  | -0.028791 |
| N | -0.945548 | -0.122278 | -0.609868 |
| C | 0.482237  | 0.446681  | -0.794547 |
| C | 0.403568  | 1.988349  | -0.886066 |
| H | 0.451610  | 0.233708  | -2.976377 |
| H | 2.370051  | 0.337695  | 0.255886  |
| C | 1.341024  | -0.027981 | 0.387338  |
| H | 0.957212  | 0.350643  | 1.345315  |
| H | 1.373819  | -1.127722 | 0.425176  |
| C | 1.025745  | -0.131237 | -2.113926 |
| H | 2.076101  | 0.174310  | -2.225721 |
| H | 0.983058  | -1.223819 | -2.128784 |
| H | -3.341770 | -0.908843 | 0.531298  |
| H | -0.834899 | 1.634581  | 1.597475  |
| C | -1.739465 | 1.029631  | 1.456061  |
| H | -2.585798 | 1.576415  | 1.897653  |
| H | -1.630052 | 0.077588  | 1.996377  |

|   |           |           |           |
|---|-----------|-----------|-----------|
| C | -3.360744 | -0.035613 | -0.133180 |
| H | -4.189515 | 0.615495  | 0.183085  |
| H | -3.537070 | -0.369090 | -1.164706 |
| H | 1.314596  | 2.336322  | -1.395996 |
| H | 0.407153  | 2.439174  | 0.118920  |
| H | -2.981322 | 2.000113  | -1.573508 |
| H | -2.383857 | 2.895017  | -0.169666 |
| H | -0.884702 | -0.944879 | 0.000793  |
| H | -0.826585 | 3.505672  | -1.856405 |
| H | -0.874469 | 1.916846  | -2.629128 |
| H | -1.301787 | -0.561916 | -1.525578 |
| F | 1.081086  | -3.530884 | -2.704398 |
| B | -0.970494 | -4.596748 | -0.900132 |
| F | -3.394846 | -4.999482 | -2.441299 |
| F | -1.218503 | -2.393524 | 1.061222  |
| C | -2.121375 | -4.462579 | 0.223114  |
| C | -3.116000 | -5.436317 | 0.462094  |
| C | -4.132387 | -5.287625 | 1.420998  |
| C | -4.179971 | -4.134992 | 2.214870  |
| C | -3.182706 | -3.163771 | 2.057929  |
| C | -2.193666 | -3.363691 | 1.094398  |
| F | -3.120351 | -6.605522 | -0.206028 |
| F | -5.058630 | -6.246070 | 1.589903  |
| F | -5.149549 | -3.971107 | 3.126931  |
| F | -3.193254 | -2.046175 | 2.818923  |
| C | 0.516729  | -4.153114 | -0.470542 |
| C | 1.012599  | -4.269271 | 0.841636  |
| C | 2.298034  | -3.854896 | 1.221684  |
| C | 3.157137  | -3.308850 | 0.257999  |
| C | 2.721533  | -3.202406 | -1.069720 |
| C | 1.437085  | -3.647529 | -1.405120 |
| F | 0.247998  | -4.809272 | 1.819024  |
| F | 2.716433  | -3.981476 | 2.495055  |
| F | 4.384789  | -2.886944 | 0.603811  |
| F | 3.529626  | -2.659062 | -2.000610 |
| C | -1.133034 | -5.665730 | -2.063542 |
| C | -0.096030 | -6.509741 | -2.506595 |
| C | -0.234761 | -7.390317 | -3.587203 |
| C | -1.452818 | -7.443513 | -4.278960 |
| C | -2.517430 | -6.626382 | -3.875653 |
| C | -2.337718 | -5.766591 | -2.789202 |

|   |           |           |           |
|---|-----------|-----------|-----------|
| F | 1.100503  | -6.531589 | -1.871108 |
| F | 0.782147  | -8.190837 | -3.961269 |
| F | -1.600962 | -8.282107 | -5.317103 |
| F | -3.688442 | -6.675070 | -4.536167 |
| H | -1.385680 | -3.291377 | -1.908862 |
| C | -1.651905 | -2.629201 | -2.958161 |
| O | -1.882443 | -1.416320 | -2.709859 |
| O | -1.626439 | -3.311328 | -3.965169 |

**TS2b**

|   |           |           |           |
|---|-----------|-----------|-----------|
| C | -0.900867 | -5.673879 | -1.970451 |
| C | -1.122953 | 1.911900  | -2.417611 |
| C | -1.805447 | 1.349112  | -1.159391 |
| N | -1.236758 | -0.028953 | -0.823952 |
| C | 0.116503  | -0.155974 | -0.174629 |
| C | 0.258178  | -6.368216 | -2.380915 |
| H | -1.524276 | -3.146561 | -2.026937 |
| F | 1.391722  | -6.297819 | -1.645039 |
| F | 1.424195  | -7.835960 | -3.860348 |
| F | -0.828293 | -8.089772 | -5.399024 |
| F | -3.138998 | -6.793290 | -4.687635 |
| C | -1.595346 | -2.620170 | -3.052204 |
| O | -1.490629 | -1.333473 | -2.982699 |
| O | -1.743039 | -3.328870 | -4.040401 |
| H | -3.810704 | 0.694394  | -0.556094 |
| H | -0.570690 | 2.499446  | 0.231395  |
| C | -1.633700 | 2.289256  | 0.041377  |
| H | -2.136399 | 3.243614  | -0.174937 |
| H | -2.085669 | 1.861761  | 0.952076  |
| C | -3.295538 | 1.084109  | -1.451258 |
| H | -3.784342 | 2.023536  | -1.746790 |
| H | -3.394345 | 0.355457  | -2.269253 |
| C | 0.300724  | -7.179068 | -3.517579 |
| C | -0.855186 | -7.317894 | -4.303367 |
| H | -1.150250 | 1.171117  | -3.228327 |
| H | -1.677921 | 2.808407  | -2.734676 |
| H | -1.894254 | -0.466017 | -0.170384 |
| C | -2.034577 | -6.658389 | -3.936086 |
| C | -2.040744 | -5.864182 | -2.784658 |
| H | -1.308704 | -0.698138 | -1.784501 |
| F | 1.147223  | -3.560700 | -2.487491 |

|   |           |           |           |
|---|-----------|-----------|-----------|
| B | -0.931586 | -4.715869 | -0.728538 |
| F | -3.207321 | -5.267543 | -2.471549 |
| F | -1.946242 | -2.334305 | 0.667862  |
| C | -2.243898 | -4.654739 | 0.170240  |
| C | -3.057773 | -5.782505 | 0.404588  |
| C | -4.230939 | -5.734868 | 1.171885  |
| C | -4.635621 | -4.518953 | 1.741527  |
| C | -3.851955 | -3.371363 | 1.549546  |
| C | -2.682905 | -3.476684 | 0.794229  |
| F | -2.717618 | -6.986685 | -0.096104 |
| F | -4.969280 | -6.839374 | 1.369391  |
| F | -5.758264 | -4.452705 | 2.470318  |
| F | -4.222521 | -2.195746 | 2.093493  |
| C | 0.378377  | -3.951362 | -0.251477 |
| C | 0.674951  | -3.731016 | 1.111315  |
| C | 1.815568  | -3.044842 | 1.550254  |
| C | 2.735321  | -2.565652 | 0.606477  |
| C | 2.507505  | -2.788757 | -0.758372 |
| C | 1.337199  | -3.444760 | -1.158344 |
| F | -0.143547 | -4.204420 | 2.077293  |
| F | 2.043745  | -2.852194 | 2.862195  |
| F | 3.831347  | -1.907810 | 1.007777  |
| F | 3.401393  | -2.357336 | -1.660991 |
| H | -0.081741 | 2.197083  | -2.225012 |
| H | 0.082465  | 0.354100  | 0.798081  |
| H | 0.799903  | -0.838423 | -2.751400 |
| H | 0.223855  | -1.232327 | 0.012849  |
| C | 1.266440  | 0.359220  | -1.005508 |
| C | 2.153391  | 1.299165  | -0.452028 |
| C | 3.247463  | 1.768671  | -1.194914 |
| C | 3.455480  | 1.302154  | -2.501654 |
| C | 2.572927  | 0.360664  | -3.056447 |
| C | 1.487299  | -0.116408 | -2.312123 |
| H | 1.986781  | 1.661128  | 0.565925  |
| H | 3.931673  | 2.496420  | -0.754624 |
| H | 4.303739  | 1.667122  | -3.083904 |
| H | 2.734522  | -0.012626 | -4.069058 |

**TS3b**

|   |           |           |          |
|---|-----------|-----------|----------|
| C | -3.573345 | -2.953689 | 1.534440 |
| C | -2.472554 | -3.215984 | 0.717177 |

|   |           |           |           |
|---|-----------|-----------|-----------|
| F | -2.932906 | -6.742155 | 0.012231  |
| F | -5.073592 | -6.280114 | 1.583677  |
| F | -5.527112 | -3.777439 | 2.613273  |
| F | -3.782108 | -1.723236 | 2.052327  |
| C | 0.460309  | -4.051150 | -0.360585 |
| F | 1.231734  | -6.537268 | -1.612328 |
| F | 1.096079  | -8.254203 | -3.685841 |
| F | -1.197821 | -8.447645 | -5.175037 |
| F | -3.380300 | -6.905932 | -4.549869 |
| C | 0.796855  | -3.796976 | 0.983675  |
| C | 1.973892  | -3.140529 | 1.373839  |
| C | 2.889659  | -2.742153 | 0.394515  |
| C | 2.628042  | -3.022326 | -0.951957 |
| H | -1.371314 | -3.269327 | -1.945661 |
| C | -1.673604 | -2.634987 | -2.903785 |
| O | -1.903079 | -1.404091 | -2.643931 |
| O | -1.709308 | -3.269140 | -3.950218 |
| C | 1.431672  | -3.655959 | -1.302146 |
| F | -0.026159 | -4.178905 | 1.984342  |
| F | 2.225613  | -2.879764 | 2.670379  |
| F | 3.996106  | -2.055349 | 0.734893  |
| C | 0.035430  | -7.479379 | -3.389062 |
| C | -2.252455 | -6.796979 | -3.827223 |
| F | 3.508512  | -2.614524 | -1.892905 |
| C | -2.171373 | -5.911352 | -2.747137 |
| C | -1.006814 | -5.750920 | -1.965002 |
| C | -1.139263 | -7.584825 | -4.149222 |
| C | 0.080117  | -6.573867 | -2.324207 |
| F | 1.209647  | -3.839794 | -2.621815 |
| B | -0.941906 | -4.678488 | -0.811608 |
| F | -3.279207 | -5.196990 | -2.468608 |
| F | -1.621853 | -2.184233 | 0.482370  |
| C | -2.203907 | -4.465551 | 0.137236  |
| C | -3.115103 | -5.485807 | 0.468339  |
| C | -4.230620 | -5.273866 | 1.292632  |
| C | -4.464043 | -3.997938 | 1.824977  |
| C | 1.756337  | 0.671268  | 0.507222  |
| C | 0.410326  | 0.834167  | 0.859203  |
| C | -0.588493 | 0.445512  | -0.042879 |
| N | -0.215366 | -0.081838 | -1.236691 |
| C | 1.077703  | -0.200156 | -1.643970 |

|   |           |           |           |
|---|-----------|-----------|-----------|
| C | 2.094641  | 0.172848  | -0.759287 |
| H | 0.122889  | 1.244306  | 1.826770  |
| H | -2.646880 | 0.036822  | -0.521286 |
| H | 0.982325  | 0.101925  | -3.757261 |
| H | 3.132618  | 0.036469  | -1.056194 |
| H | 2.543627  | 0.935115  | 1.214867  |
| C | -2.063257 | 0.607956  | 0.211372  |
| H | -2.324765 | 0.261359  | 1.219066  |
| H | -2.332980 | 1.674207  | 0.129238  |
| C | 1.313744  | -0.676124 | -3.050178 |
| H | 2.377708  | -0.877437 | -3.211524 |
| H | 0.738423  | -1.580217 | -3.279838 |
| H | -0.987226 | -0.607242 | -1.847555 |

#### **TS4b**

|   |           |           |           |
|---|-----------|-----------|-----------|
| C | -1.105681 | 1.763700  | -1.660537 |
| C | -2.480512 | 1.459588  | -1.014615 |
| C | -2.442432 | 0.293960  | 0.022139  |
| N | -1.187205 | -0.539401 | -0.269850 |
| C | 0.204250  | 0.135945  | -0.201421 |
| C | 0.037986  | 1.612320  | -0.643262 |
| H | 0.722280  | -0.553077 | -2.216210 |
| H | 1.767711  | 0.490204  | 1.222859  |
| C | 0.776024  | 0.013744  | 1.218204  |
| H | 0.151470  | 0.511035  | 1.968912  |
| H | 0.901209  | -1.038247 | 1.509243  |
| C | 1.090864  | -0.646859 | -1.184754 |
| H | 2.113186  | -0.245023 | -1.136862 |
| H | 1.123921  | -1.714981 | -0.928898 |
| H | -3.594242 | -1.479543 | 0.582029  |
| H | -1.662143 | 1.598714  | 1.613981  |
| C | -2.401020 | 0.799261  | 1.473859  |
| H | -3.390808 | 1.213171  | 1.717373  |
| H | -2.184712 | -0.018425 | 2.175988  |
| C | -3.630378 | -0.666319 | -0.156026 |
| H | -4.561952 | -0.099489 | -0.010681 |
| H | -3.635075 | -1.095316 | -1.167276 |
| H | 0.993907  | 1.942652  | -1.076803 |
| H | -0.155987 | 2.252339  | 0.232425  |
| H | -3.202435 | 1.219373  | -1.808909 |
| H | -2.853382 | 2.356582  | -0.495779 |



|   |           |           |           |
|---|-----------|-----------|-----------|
| H | -1.196590 | -1.380329 | 0.342889  |
| H | -1.114287 | 2.781248  | -2.077660 |
| H | -0.936395 | 1.073997  | -2.501870 |
| H | -1.319541 | -0.919557 | -1.232881 |
| H | 0.491970  | -3.652685 | -3.389309 |
| B | -1.154493 | -4.364958 | -1.196744 |
| H | -3.580441 | -4.864707 | -2.637155 |
| H | -0.054871 | -2.983422 | 1.093239  |
| C | -1.819044 | -3.954180 | 0.246325  |
| C | -3.159871 | -4.288733 | 0.545991  |
| C | -3.746776 | -3.879751 | 1.745851  |
| C | -3.070923 | -3.108991 | 2.703680  |
| C | -1.744661 | -2.796266 | 2.406522  |
| C | -1.115082 | -3.200712 | 1.223263  |
| H | -3.747329 | -4.886919 | -0.149755 |
| F | -5.031746 | -4.222165 | 2.004842  |
| H | -3.547653 | -2.791979 | 3.628876  |
| F | -1.046580 | -2.017578 | 3.287225  |
| C | 0.465580  | -4.279584 | -1.297453 |
| C | 1.309654  | -4.644517 | -0.221884 |
| C | 2.701217  | -4.587907 | -0.361516 |
| C | 3.324196  | -4.180726 | -1.543844 |
| C | 2.477739  | -3.851768 | -2.609319 |
| C | 1.086075  | -3.897852 | -2.509852 |
| H | 0.895120  | -4.983861 | 0.727389  |
| F | 3.484544  | -4.931981 | 0.694796  |
| H | 4.407520  | -4.136864 | -1.636787 |
| F | 3.045622  | -3.463258 | -3.781387 |
| C | -1.758150 | -5.739248 | -1.810410 |
| C | -1.055944 | -6.954860 | -1.653265 |
| C | -1.609569 | -8.148507 | -2.122098 |
| C | -2.852181 | -8.205440 | -2.762378 |
| C | -3.529200 | -6.992037 | -2.917749 |
| C | -3.011897 | -5.777113 | -2.460393 |
| H | -0.077179 | -6.977135 | -1.173238 |
| F | -0.919799 | -9.308969 | -1.956795 |
| H | -3.265591 | -9.143135 | -3.128498 |
| F | -4.737847 | -7.003583 | -3.542102 |
| H | -1.602397 | -3.417279 | -2.010681 |
| C | -1.860031 | -2.499451 | -3.327769 |
| O | -1.786453 | -1.361328 | -2.902480 |

|   |           |           |           |
|---|-----------|-----------|-----------|
| O | -2.024327 | -3.263437 | -4.226929 |
|---|-----------|-----------|-----------|

**TS5b**

|   |           |           |           |
|---|-----------|-----------|-----------|
| C | -1.279775 | 1.749517  | -1.717612 |
| C | -2.649999 | 1.349055  | -1.118632 |
| C | -2.579262 | 0.178945  | -0.088009 |
| N | -1.273671 | -0.590963 | -0.334433 |
| C | 0.078667  | 0.164731  | -0.254432 |
| C | -0.159199 | 1.636712  | -0.673076 |
| H | 0.654893  | -0.444988 | -2.275968 |
| H | 1.594953  | 0.630760  | 1.189245  |
| C | 0.651394  | 0.065125  | 1.166849  |
| H | -0.022939 | 0.491940  | 1.919412  |
| H | 0.870259  | -0.977455 | 1.433178  |
| C | 1.011317  | -0.556927 | -1.241935 |
| H | 2.017135  | -0.118707 | -1.165993 |
| H | 1.081171  | -1.631579 | -1.018997 |
| H | -3.673632 | -1.644653 | 0.430222  |
| H | -1.882415 | 1.472228  | 1.554005  |
| C | -2.610330 | 0.671977  | 1.367123  |
| H | -3.613321 | 1.077724  | 1.566839  |
| H | -2.430406 | -0.163198 | 2.060850  |
| C | -3.716249 | -0.832028 | -0.307692 |
| H | -4.674555 | -0.301675 | -0.199789 |
| H | -3.664966 | -1.260298 | -1.318259 |
| H | 0.789946  | 2.025615  | -1.072190 |
| H | -0.410280 | 2.247470  | 0.209125  |
| H | -3.329359 | 1.072285  | -1.937853 |
| H | -3.095926 | 2.215105  | -0.604467 |
| H | -1.241653 | -1.416363 | 0.302220  |
| H | -1.336285 | 2.776606  | -2.107404 |
| H | -1.047661 | 1.094972  | -2.570893 |
| H | -1.360942 | -0.991633 | -1.290442 |
| H | 0.762937  | -3.489750 | -3.218051 |
| B | -1.025177 | -4.264621 | -1.150842 |
| H | -3.524247 | -4.531359 | -2.462832 |
| H | 0.184889  | -2.981417 | 1.086981  |
| C | -1.630792 | -3.877427 | 0.329865  |
| C | -2.963151 | -4.184723 | 0.704259  |
| C | -3.505497 | -3.797634 | 1.939417  |
| C | -2.730064 | -3.075775 | 2.865232  |

|   |           |           |           |
|---|-----------|-----------|-----------|
| C | -1.397907 | -2.774988 | 2.544147  |
| C | -0.868722 | -3.176393 | 1.301333  |
| H | -3.581801 | -4.751851 | 0.006452  |
| H | -4.538376 | -4.059353 | 2.184660  |
| H | -3.150168 | -2.777696 | 3.828759  |
| H | -0.764771 | -2.245935 | 3.262454  |
| C | 0.601042  | -4.319301 | -1.224185 |
| C | 1.375354  | -4.878443 | -0.177848 |
| C | 2.774681  | -4.982905 | -0.251499 |
| C | 3.454173  | -4.526724 | -1.391555 |
| C | 2.715522  | -3.984228 | -2.455946 |
| C | 1.317536  | -3.892239 | -2.367440 |
| H | 0.864291  | -5.239910 | 0.718412  |
| H | 3.333314  | -5.422229 | 0.579783  |
| H | 4.542791  | -4.600646 | -1.453992 |
| H | 3.228918  | -3.639479 | -3.358010 |
| C | -1.745629 | -5.571615 | -1.796544 |
| C | -1.140722 | -6.847932 | -1.743417 |
| C | -1.783221 | -7.995198 | -2.235730 |
| C | -3.061887 | -7.897244 | -2.807413 |
| C | -3.685662 | -6.641406 | -2.882706 |
| C | -3.029712 | -5.504672 | -2.385315 |
| H | -0.141130 | -6.938640 | -1.310555 |
| H | -1.284069 | -8.966663 | -2.178235 |
| H | -3.563276 | -8.787005 | -3.196975 |
| H | -4.676418 | -6.547920 | -3.336490 |
| H | -1.394154 | -3.272389 | -1.926964 |
| C | -1.674063 | -2.429724 | -3.455680 |
| O | -1.777981 | -1.288698 | -3.062953 |
| O | -1.653328 | -3.282925 | -4.277635 |
